# Supplementary material
Source: PubMed Central journal article supplement (PMC4278636)
Supplement: NIHMS649617-supplement-Supplementary_Data.pdf [file NIHMS649617-supplement-Supplementary_Data.pdf]

## Supplementary Online Content

Lee H, Deignan JL, Dorrani N, Strom SP, Kantarci S, Quintero-Rivera F, et al. Clinical exome sequencing for genetic identification of rare Mendelian disorders. *JAMA*. doi:10.1001/jama.2014.14604.

**eMethods 1.** Sample acquisition and pre-test sample processing

**eMethods 2.** Exome capture and sequencing

**eMethods 3.** Sequence data analysis

**eMethods 4.** Variant filtration and interpretation

**eMethods 5.** Determination of variant pathogenicity

**eFigure 1.** UCLA Clinical Exome Sequencing (CES) workflow

**eFigure 2.** Variant filtration workflow starting with ~21K variants across the exome and comparing the mean number of variants observed from trio-CES versus proband-CES

**eFigure 3.** Variant classification workflow for the variants found within the primary genelist (PGL)

**eTable 1.** Metrics used to determine the adequate quality of the sequencing test for each sample

**eTable 2.** List of molecular diagnoses made

**eTable 3.** List of copy number variants (CNVs) and uniparental disomy (UPD) reported and confirmatory status

**eTable 4.** Demographic summary of 814 cases

**eTable 5.** Molecular Diagnosis Rate of Phenotypic Subgroups by Age Group for Other Clinical Exome Sequencing

### References

This supplementary material has been provided by the authors to give readers additional information about their work.

## eMethods 1. Sample acquisition and pre-test sample processing.

Once determined by the ordering physician that the patient's presentation is clinically appropriate for CES, patients were offered the test after a counseling session ("pre-test counseling") [eFigure 1]. If the patient agreed to the CES test, a whole blood sample was collected in an EDTA or lavender top tube and sent to the UCLA Molecular Diagnostics Laboratories. Only blood samples collected within 96 hours prior to arrival in the laboratory were accepted. High molecular weight genomic DNA samples extracted in an outside facility were also accepted when whole blood samples were unavailable or difficult to obtain (such as those from international patients). The minimum required amount of genomic DNA was 10ug at 100ng/μl, preferably accompanied with the 1-2% agarose gel run image and 260/280 ratio. Other specimen types were not acceptable (except for the cases where whole blood samples were not available such as terminated fetuses). Genomic DNA was either extracted using standard methods (QIACube Qiagen, Valencia, CA) and was run on 1% agarose gel to check for degradation and measured by both Nanodrop and Qubit (Life Technologies).

## eMethods 2. Exome capture and sequencing.

Library preparation, sequencing and data analysis were performed at the UCLA Clinical Genomics Center using CLIA (Clinical Laboratory Improvement Amendments) and CAP (College of American Pathologists) validated protocols [eFigure 1]. For the Trio CES cases where the three samples were not received at the same time, the DNA was extracted upon receipt but the library preparation and sequencing were put on hold until all three samples were received to minimize batch effects. As described in Strom et al.<sup>1</sup>, multiple steps including checking the inheritance status in the trios and comparing to previous genetic test results are taken to reduce the probability of sample swap errors. Three μg of high molecular weight genomic DNA (as measured by Qubit) from each participant was subjected to library preparation and exome capture following the customized Agilent SureSelect Human All Exon V2 50Mb Illumina Paired-End Sequencing Library Prep Protocol. Sequencing was performed on an Illumina HiSeq2000 or HiSeq2500 as a 50bp or 100bp paired-end run, respectively. For each sample, approximately 60 million independent paired reads were generated.

## eMethods 3. Sequence data analysis.

The sequence data were aligned to the GRCh37 human reference genome using Novoalign (Novocraft, <http://www.novocraft.com/main/index.php>) V2.07.15b. PCR duplicates were marked using Picard-tools-1.42 (<http://picard.sourceforge.net/>) [eFigure 1]. GATK<sup>2,3</sup> v1.1-33 was used for INDEL (insertions and deletions) realignment and base quality recalibration. Both SNVs (single nucleotide variants) and small INDELS within the coding regions +/-2bp were called using GATK unified genotyper. SNVs were recalibrated using GATK Variant Quality Score Recalibration (VQSR) tool and INDELS were filtered using GATK INDEL filtration tool. Variants were evaluated using GATK VariantEval tool and all variants were annotated using Variant Annotator X (VAX)<sup>4</sup>. GATK DepthOfCoverage tool was used to calculate depth of coverage for each chromosomal arm, chromosome X, Y and MT, genome and exome. Linkdatagen (<http://bioinf.wehi.edu.au/software/linkdatagen/>)<sup>5,6</sup> and PLINK (<http://pngu.mgh.harvard.edu/~purcell/plink/>)<sup>7</sup> were used to determine regions of homozygosity by descent (ROH).

## eMethods 4. Variant filtration and interpretation.

Annotated variants were deposited into MySQL 5.2 database for filtering [eFigure 1 and 2]. First step of variant filtration was selecting only the variants that result in amino acid alteration in any of the transcripts. Second step of variant filtration was filtering out common variants with minor allele frequency (MAF) of 1%. MAF was estimated using a combined dataset incorporating all available data from the 1000 genomes project (1Kg), NHLBI exome sequencing project (ESP), NIEHS environmental genome project (EGP) and HapMap, without the distinction of ethnic background. Any variant not observed in any of these datasets was considered "novel" for future analysis.

Then, for the trio-CES cases, variants were further filtered into 4 categories [eFigure 2]: *de novo* variants, homozygous variants, compound heterozygous (CH) variants and inherited heterozygous variants. There were 0-3 high quality *de novo* amino acid altering novel variants where the proband is heterozygous and the parents and >50 samples analyzed in the same batch are unambiguously (no indication of the variant allele being present) homozygous for the reference allele with >10X coverage, ≥500 QUAL score, and marked as PASS filters by GATK VariantEval. For non-consanguineous families, there were <10 homozygous variants that are not homozygous in the parents and <10 genes with CH variants (one variant inherited from the father and the other variant inherited from the mother). Rest of the variants would have been inherited from either of the parents. For proband-CES cases, it was not possible to deduce *de novo* or CH variants, so ~600 heterozygous and <10 homozygous variants were subject for primary interpretation.

First step of interpretation was intersecting the genotype data with the phenotype information of the patient. To achieve that, first a list of phenotypic keywords was generated by extracting clinical information from the clinical notes submitted by the ordering physician. If any genetic testing was done prior to ordering CES, the reports or the results from those testing was highly recommended for submission as these information was not only useful to confirm that CES also replicates the findings, if there were any, and also guided the interpretation by giving better idea which differential diagnoses were considered. From the phenotypic keyword list, a

permissive primary gene-list (PGL) was generated by entering each keyword as a search term in the Human Gene Mutation Database Professional version (HGMD) and Online Mendelian Inheritance in Man (OMIM) database, then compiling the results to create a list of all unique gene names returned by either or both databases. Then, the PGL and the filtered variants were intersected.

For proband-CES cases, all homozygous variants, potential compound heterozygous variants (defined as genes with >1 variant locus per individual) and heterozygous variants with MAF<0.1% that are found within the PGL were equally weighed and carefully curated by the bioinformaticians [eFigure 2]. MAF 0.1% cutoff for autosomal dominant disorder is a commonly accepted threshold.<sup>8</sup> Heterozygous variants with MAF<1% identified in genes known to cause recessive disorders that fit the patient's phenotype well were highlighted for review at the Genomic Data Board (GDB) meeting. For trio-CES cases, all *de novo*, homozygous CH variants (regardless PGL status) were curated, and candidate variants were highlighted for review at the GDB meeting based on phenotypic correlation [eFigure 2]. Inherited heterozygous variants found in PGL that were annotated as pathogenic by HGMD or ClinVar ([www.ncbi.nlm.nih.gov/clinvar/](http://www.ncbi.nlm.nih.gov/clinvar/)) were equally weighed as well.

## eMethods 5. Determination of variant pathogenicity

All the highlighted variants for each CES case were presented to the GDB. Determining which variants to report and how to determine their pathogenicity was done according to current ACMG sequence interpretation guidelines [eFigure 3].

For each gene with at least one highlighted variant, the patient's phenotype, the patient's variant(s), the clinical conditions associated that gene, the mode of inheritance associated with disease, and the variants classes (e.g. missense, truncating, repeat expansion) in the gene that are disease-associated were considered by the GDB. Correlation between variant type(s) and the mode(s) of inheritance associated with relevant genetic conditions were considered according to the following criteria:

| Mode of inheritance | Variant types                                                                                                                                       |
|---------------------|-----------------------------------------------------------------------------------------------------------------------------------------------------|
| Autosomal Recessive | Homozygous<br>Compound heterozygous (trio-CES)<br>Potential compound heterozygous in PGL (proband-CES, duo-CES*)                                    |
| Autosomal Dominant  | Heterozygous inherited from affected parent (trio-CES, duo-CES)<br>Heterozygous in PGL (proband-CES)                                                |
| Sporadic            | <i>De Novo</i> (trio-CES)<br>Heterozygous not inherited from parent (duo-CES)<br>Potential <i>de novo</i> : heterozygous novel in PGL (proband-CES) |
| X-linked recessive  | Hemizygous (males)<br>Homozygous X-linked (females)<br>Compound heterozygous (females, trio-CES and duo-CES, father must be potentially affected)   |
| X-linked dominant   | Heterozygous X-linked (females) inherited from affected parent (trio-CES and duo-CES)<br>Heterozygous X-linked novel in PGL (females)               |
| Mitochondrial       | MT-DNA variants only                                                                                                                                |

\*Duo-CES is part of other-CES where only one parent was available for testing.

If both the phenotype and mode of inheritance were found to be consistent with the observed variant(s) by the GDB, and if the variant was deemed to be a known pathogenic variant after literature review, we reported the variant as Pathogenic. If the variant has not been published as pathogenic, we would search all known variants in the gene to check the variant type (i.e. missense, early-termination, gross deletion or duplication, splice defect) and examine if the type of variant identified is similar to the type of known variants or overlaps a known variant. If so, we reported the variants as Likely Pathogenic. If not, other information such as gene-wise rare variant burden in the general population and gene-wise rare variant burden in internal data were considered by the GDB to estimate whether the variant(s) meet criteria as likely pathogenic. An illustrative example of the importance of gene-wise rare variant burden is the titin gene *TTN*, which is known to have a very high rare variant burden<sup>9</sup>. Novel missense variants in *TTN* are typically not reported, while truncating variants were reported as likely pathogenic heterozygous (patient #180 in eTable 2) or pathogenic (if homozygous or compound heterozygous).

For proband-CES cases with more than one heterozygous variant in a recessive gene, we reported the variants as likely pathogenic rather than pathogenic to account for the uncertain phase (i.e. whether the variants are in *cis* or *trans*). In cases where the patient appeared to be a carrier of a single pathogenic or likely pathogenic heterozygous variant in a gene causing an autosomal recessive disorder, we reported the variant as a VUS along with gene coverage information and recommended further testing. When a variant was found within a gene that could fit the patient's clinical presentation but not perfectly matched, we reported a known variant as Likely Pathogenic when the inheritance mode fit and as VUS when the inheritance mode of the variant was unknown. If the variant was not a known variant, the same questions for variant type and mutational burden for the gene were asked to determine the pathogenicity.

If a variant did not meet the above listed criteria but was determined by the GDB to be relevant to the care and management of the patient's primary clinical concerns, it was reported as a variant of uncertain clinical significance (VUS).

For cases reviewed prior to July 1, 2013 (over 300 cases), all reported variants were confirmed by Sanger sequencing as an alternate methodology, with a confirmation rate >99%. After empirically determining that SNVs with QUAL score  $\geq 500$  are highly accurate<sup>1</sup>, routine confirmation of such variants was stopped for cases reviewed after July 1, 2013 (>250 cases to date). Confirmation of low quality SNVs and all small insertion/deletion variants identified by CES (approximately 20% of reported variants) are still routinely confirmed by Sanger sequencing. On rare occasions, when attempting to confirm low quality SNVs or insertion/deletion variants, PCR amplification failed using two unique primer sets. For these variants, cases were signed-out with a note indicating that confirmation was not possible within the confines of CES testing with a recommendation to seek confirmation by an outside laboratory.

**eFigure 1. UCLA Clinical Exome Sequencing (CES) workflow.**

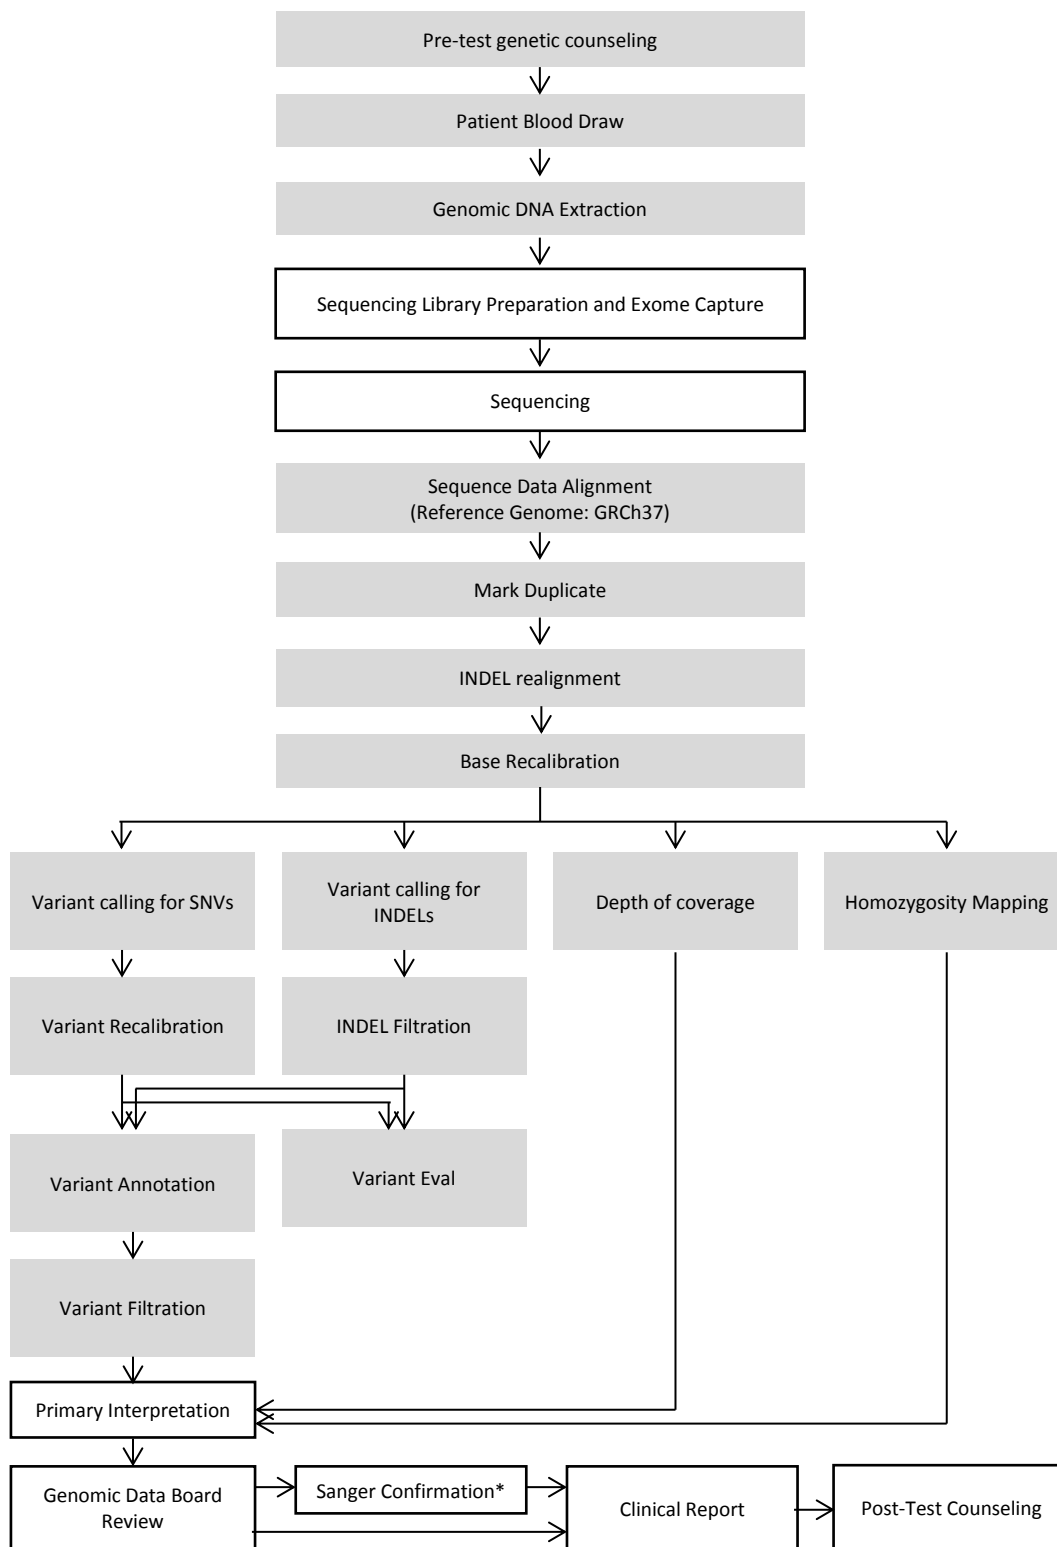

\*Sanger confirmation was only performed on SNVs with QUAL score <500 or flagged as Truncated by GATK VQSR and all small INDELS.

**eFigure 2. Variant filtration workflow starting with ~21K variants across the exome and comparing the approximate number of variants observed from trio-CES versus proband-CES.**

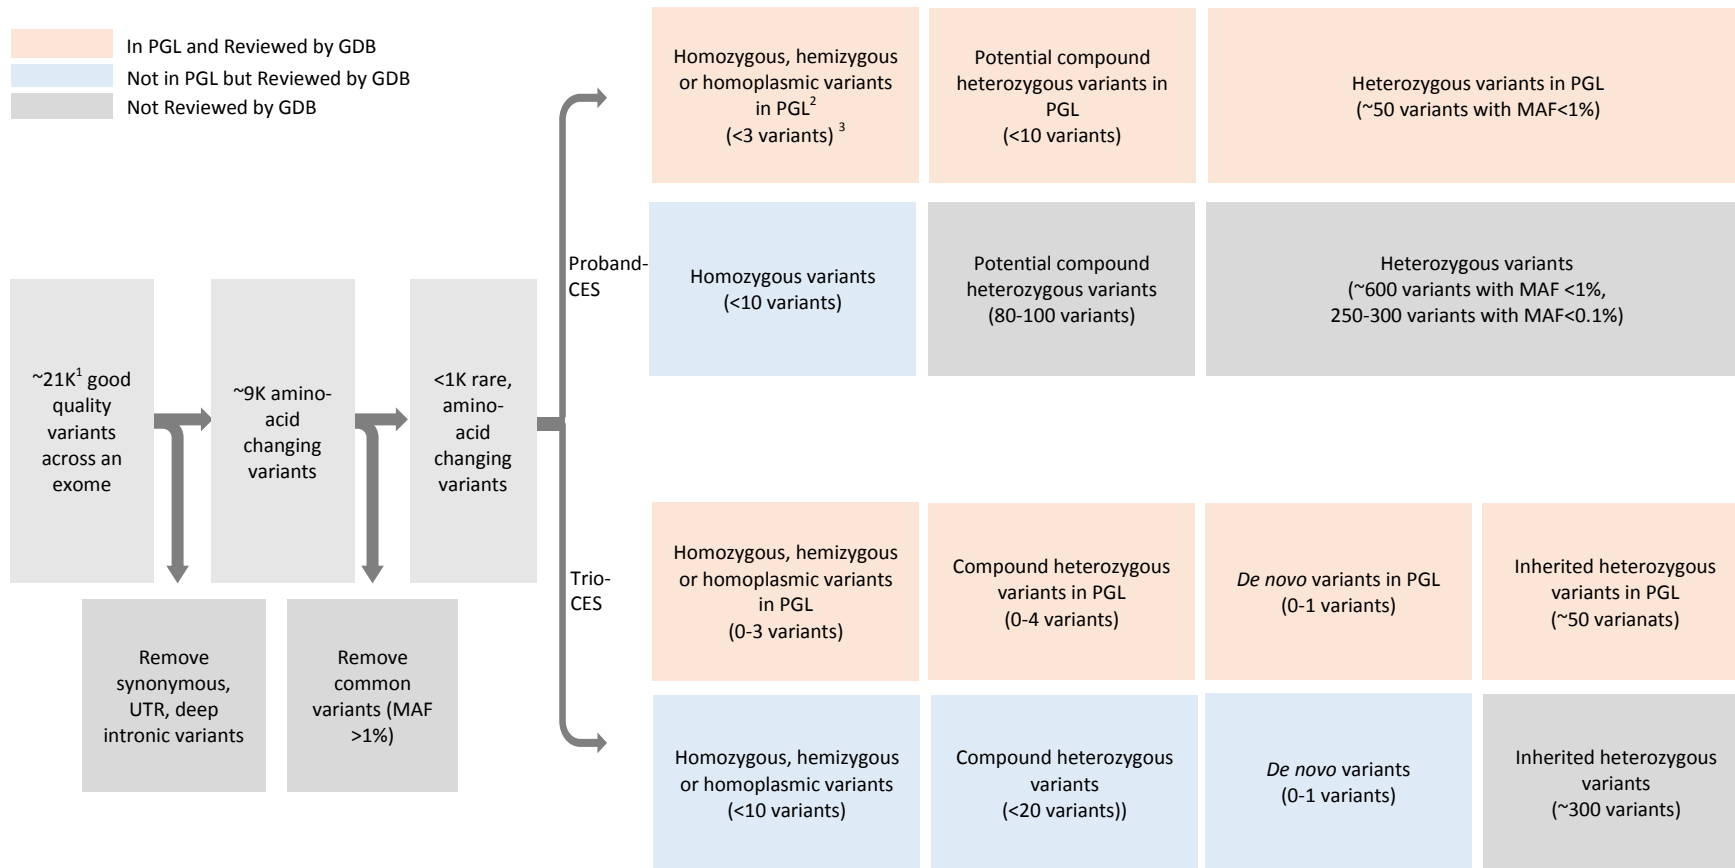

<sup>1</sup> European Caucasian sample.

<sup>2</sup> Primary genelist (PGL): Number of variants identified in PGL varied by the size of the PGL. Numbers in this figure were generated assuming the PGL contained ~1000 genes.

<sup>3</sup> Non-consanguineous sample.

**eFigure 3. Variant classification workflow for the variants found within the primary genelist (PGL).**

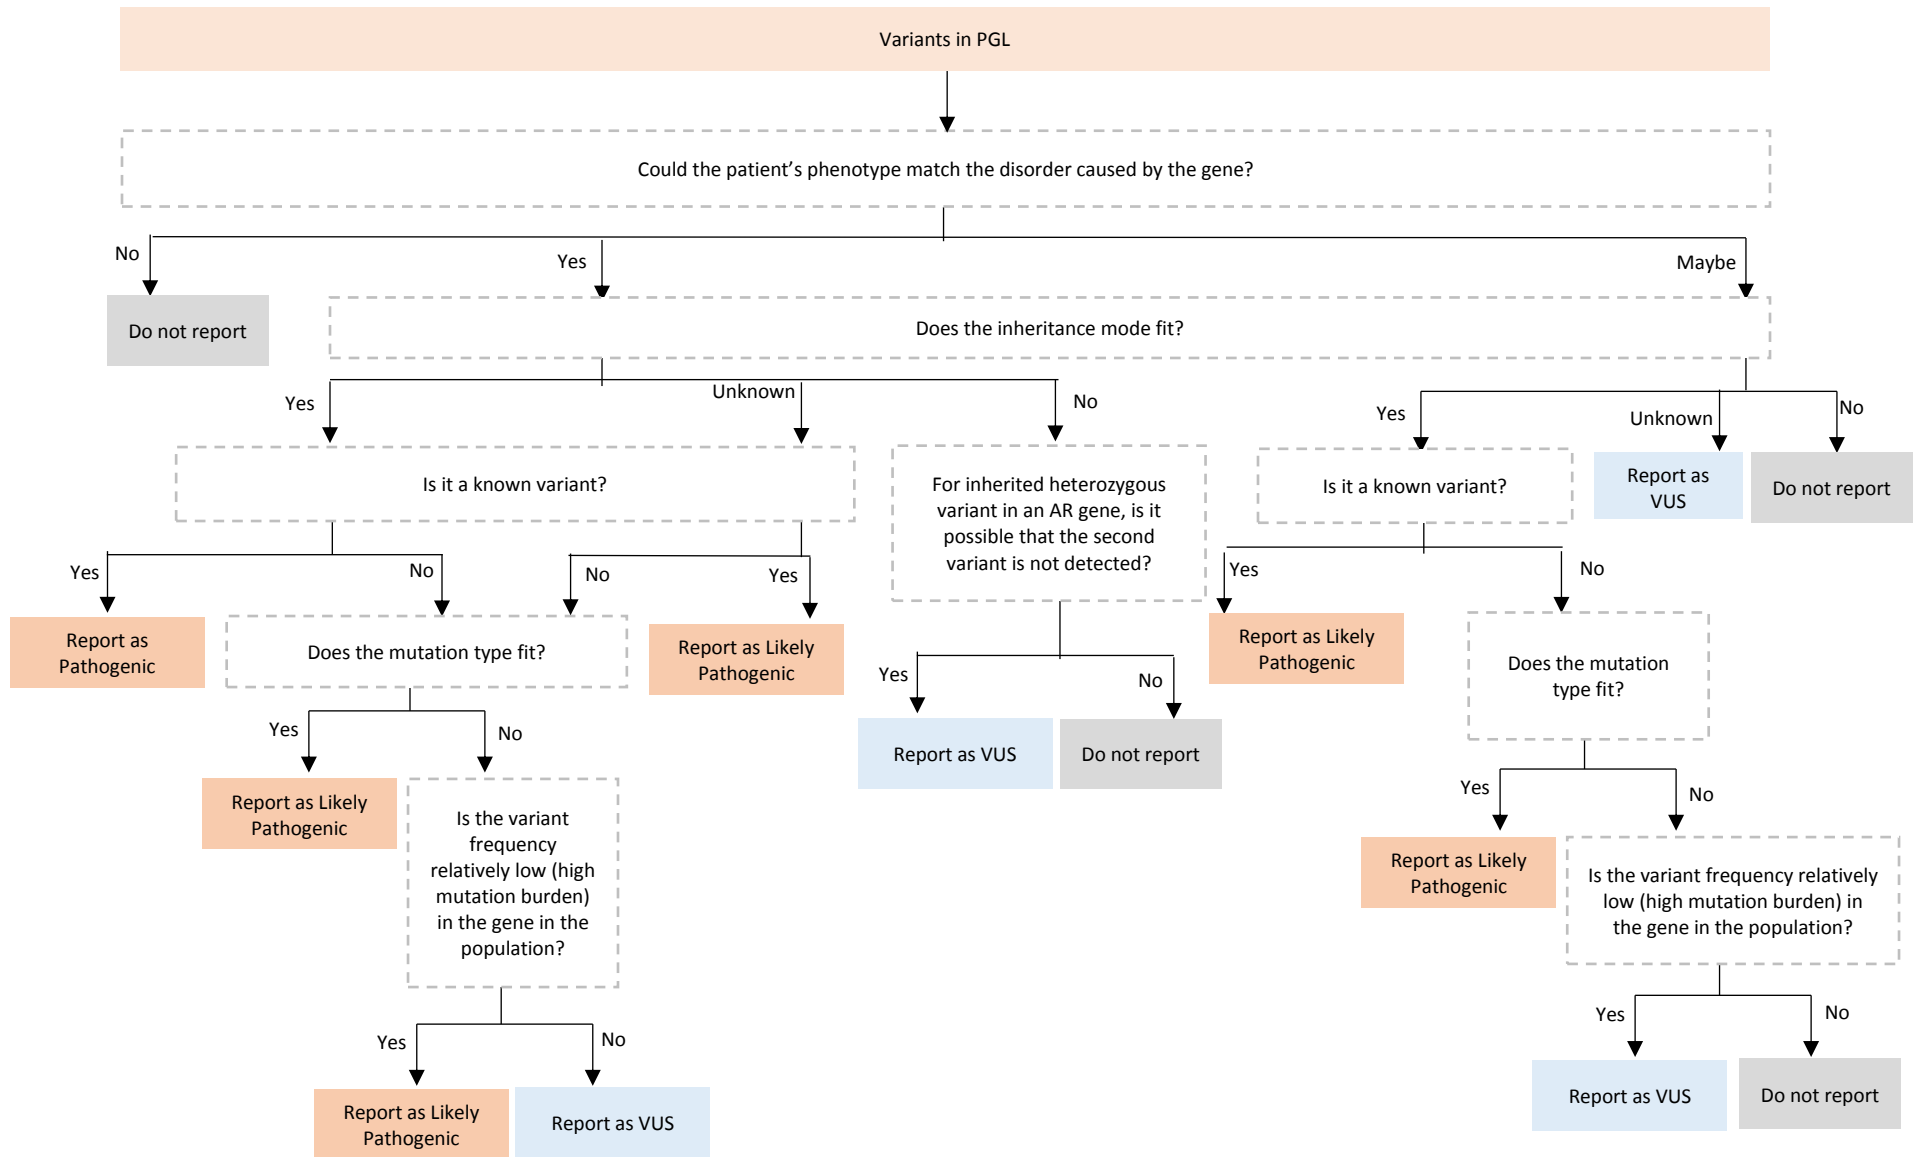



**eTable 1. Metrics used to determine the adequate quality of the sequencing test for each sample:** total number of single nucleotide variants (SNVs) called, percentage of those SNVs found in dbSNP132 (i.e. known variants), concordance rate of the called non-reference variant at dbSNP positions with the known alternate variants, transition to transversion (Ti/Tv) ratio, heterozygous/homozygous ratio, and total number of small insertions and deletions (indels, <10bp) found. Mean and standard deviation of each metric is shown and samples are divided into non-African American and African American, as African Americans have a substantially higher number of variants than non-African Americans due to their higher diversity<sup>10</sup>.

| Metrics                                | Mean (Standard Deviation) |                                   |                            |
|----------------------------------------|---------------------------|-----------------------------------|----------------------------|
|                                        | All<br>(n=1,734)          | Non-African American<br>(n=1,662) | African American<br>(n=72) |
| Total No. SNVs                         | 21,278 (859)              | 24,789 (919)                      | 21,126 (419)               |
| % of SNVs found in dbSNP132 (known)    | 96.5% (0.6)               | 95.2% (0.5)                       | 96.5% (0.6)                |
| Concordance rate of the known variants | 99.9% (0)                 | 99.9% (0)                         | 99.9% (0)                  |
| Known variants                         |                           |                                   |                            |
| Ti/Tv ratio                            | 3.15 (0.04)               | 3.18 (0.03)                       | 3.15 (0.04)                |
| Het/Homo ratio                         | 1.46 (0.14)               | 1.85 (0.14)                       | 1.44 (0.12)                |
| Novel variants                         |                           |                                   |                            |
| Ti/Tv ratio                            | 2.75 (0.25)               | 2.73 (0.16)                       | 2.75 (0.25)                |
| Het/Homo ratio                         | 18.81 (5.95)              | 25.18 (8.78)                      | 18.54 (5.64)               |
| Total No. of INDELS                    | 1385 (163)                | 1487 (176)                        | 1381 (161)                 |

eTable 2. List of molecular diagnoses made. (P: Pathogenic, LP: Likely pathogenic, VUS: Variant of uncertain significance, U: Unknown, M: Mother, F: Father)

| Patient Index      | Age | Gene Name       | Protein Change  | Variant Class | Inherited From | Disease Name                                                                                                                                                                                                                                                                                   | Clinical Indication*                                                                                                                                                                                                                          |
|--------------------|-----|-----------------|-----------------|---------------|----------------|------------------------------------------------------------------------------------------------------------------------------------------------------------------------------------------------------------------------------------------------------------------------------------------------|-----------------------------------------------------------------------------------------------------------------------------------------------------------------------------------------------------------------------------------------------|
| <b>Proband-CES</b> |     |                 |                 |               |                |                                                                                                                                                                                                                                                                                                |                                                                                                                                                                                                                                               |
| <b>Homozygous</b>  |     |                 |                 |               |                |                                                                                                                                                                                                                                                                                                |                                                                                                                                                                                                                                               |
| 1                  | 8   | <i>CLN8</i>     | p.Arg204Cys     | LP            | U              | ceroid-lipofuscinosis, neuronal 8 [MIM: 600143]                                                                                                                                                                                                                                                | infantile neuroaxonal dystrophy, developmental deterioration, seizure                                                                                                                                                                         |
| 2                  | 10  | <i>AHI1</i>     | p.Glu1086Gly    | LP            | U              | autosomal recessive Joubert syndrome 3 [MIM: 608629]                                                                                                                                                                                                                                           | ataxia, motor delay, cognitive delay, cataracts, oral facial dystonia, cerebellar atrophy, midbrain atrophy, brain atrophy, hypotonia, spasticity, inversion of feet, cerebellar degeneration                                                 |
| 3                  | 37  | <i>USH2A</i>    | p.Cys759Phe     | LP            | U              | autosomal recessive Retinitis Pigmentosa type 39 [MIM: 613809]                                                                                                                                                                                                                                 | retinitis pigmentosa, nyctalopia, night blindness, vision loss, intraretinal pigmentation                                                                                                                                                     |
| 4                  | 50  | <i>CRB1</i>     | p.Val743Leu     | LP            | U              | autosomal recessive retinitis pigmentosa type 12 [MIM: 600105]                                                                                                                                                                                                                                 | retinitis pigmentosa, helicoid dystrophy, macular edema, retinal dystrophy                                                                                                                                                                    |
| 5                  | 57  | <i>SYNE1</i>    | Splice Defect   | LP            | U              | autosomal recessive spinocerebellar ataxia type 8 (SCAR8) [MIM: 610743]                                                                                                                                                                                                                        | Pure cerebellar ataxia, cerebellar atrophy                                                                                                                                                                                                    |
| 6                  | 1   | <i>CDK5RAP2</i> | p.Arg1481*      | LP            | U              | autosomal recessive primary microcephaly type 3 [MIM: 604804]                                                                                                                                                                                                                                  | Agensis of corpus callosum, constipation, dysmorphic features, hearing loss, hoarse voice, holoprosencephaly, hypotelorism, interhemispheric cyst, lissencephaly, microcephaly, pachygyria, speech delay                                      |
| 7                  | 26  | <i>SPG7</i>     | p.Gly577Ser     | LP            | U              | autosomal recessive Spastic Paraplegia type 7 [MIM: 607259]                                                                                                                                                                                                                                    | Cerebellar atrophy, Brainstem atrophy, deafness, ataxia, Hyper-reflexia, Hyperreflexia                                                                                                                                                        |
| 8                  | 39  | <i>RPGRI1</i>   | p.Asp966Ilefs   | LP            | U              | autosomal recessive cone-rod dystrophy 13 [MIM: 608194]                                                                                                                                                                                                                                        | blurred vision, rod-cone dystrophy, retinitis pigmentosa, nystagmus, color disturbance, retinal pigment epithelium atrophy, pigment clump, Leber Congenital Amaurosis                                                                         |
| 9                  | 16  | <i>GMPPB</i>    | p.Arg185Cys     | P             | U              | Muscular dystrophy-dystroglycanopathy (congenital with brain and eye anomalies), type A, 14 [MIM: 615350]; Muscular dystrophy-dystroglycanopathy (congenital with mental retardation), type B, 14 [MIM: 615351]; Muscular dystrophy-dystroglycanopathy (limb-girdle), type C, 14 [MIM: 615352] | muscle weakness, muscular dystrophy, asthenic build, cataracts, dysmorphic features, short stature, learning disability, Marinesco-Sjogren syndrome, scoliosis, arachnodactyly, Camptodactyly, dystroglycanopathy, laminopathy, arthrogyrosis |
| 10                 | 16  | <i>DCAF17</i>   | p.Ile97Asnfs*22 | P             | U              | autosomal recessive Woodhouse-                                                                                                                                                                                                                                                                 | developmental delay, short stature,                                                                                                                                                                                                           |

| Patient Index                          | Age | Gene Name    | Protein Change | Variant Class | Inherited From | Disease Name                                                                                                                            | Clinical Indication*                                                                                                                                                                       |
|----------------------------------------|-----|--------------|----------------|---------------|----------------|-----------------------------------------------------------------------------------------------------------------------------------------|--------------------------------------------------------------------------------------------------------------------------------------------------------------------------------------------|
|                                        |     |              |                |               |                | Sakati Syndrome [MIM: 241080]                                                                                                           | microcephaly, small pituitary, hypopituitarism, delayed puberty, small testes, low IGF1, hyperreflexia, gait problem                                                                       |
| 11                                     | 62  | <i>GBE1</i>  | p.Tyr329Ser    | P             | U              | autosomal recessive adult polyglucosan body disease [MIM: 263570]; glycogen storage disease type IV [MIM: 232500]                       | Leukodystrophy, White matter, Ataxia, Neuropathy                                                                                                                                           |
| <b>Hemizygous</b>                      |     |              |                |               |                |                                                                                                                                         |                                                                                                                                                                                            |
| 12                                     | 12  | <i>DMD</i>   | p.Gly1334*     | LP            | U              | Duchenne muscular dystrophy (DMD) [MIM: 310200]                                                                                         | autism, hyper-Ckemia, muscular dystrophy, dystrophin, cardiomyopathy, rhabdomyolysis                                                                                                       |
| 13                                     | 36  | <i>G6PD</i>  | p.Ser188Phe    | LP            | U              | X-linked chronic non-spherocytic hemolytic anemia due to G6PD deficiency [MIM: 305900]                                                  | G6PD deficiency, spasticity, Upper motor neuron, Dysgraphia, Learning disability, Spinal cord atrophy, White matter changes, Leukodystrophy, Vitamin E deficiency, Abnormal liver function |
| <b>Potential Compound Heterozygous</b> |     |              |                |               |                |                                                                                                                                         |                                                                                                                                                                                            |
| 14                                     | 27  | <i>TTN</i>   | p.Asp17434Gly  | LP            | U              | Cardiomyopathy, dilated, 1G [MIM: 604145]; Cardiomyopathy, familial hypertrophic, 9 [MIM: 613765]                                       | marfan, mitral, mitral valve prolapse, atrial fibrillation, cardiomyopathy, connective tissue disorder                                                                                     |
| 14                                     | 27  | <i>TTN</i>   | p.Cys12844*    | LP            | U              | Cardiomyopathy, dilated, 1G [MIM: 604145]; Cardiomyopathy, familial hypertrophic, 9 [MIM: 613765]                                       | marfan, mitral, mitral valve prolapse, atrial fibrillation, cardiomyopathy, connective tissue disorder                                                                                     |
| 15                                     | 44  | <i>SYNE1</i> | Splice defect  | LP            | U              | SYNE1-related autosomal recessive cerebellar ataxia (also known as autosomal recessive cerebellar ataxia type 1 or ARCA1) [MIM: 610743] | cerebellar ataxia                                                                                                                                                                          |
| 15                                     | 44  | <i>SYNE1</i> | p.Lys3216*     | LP            | U              | SYNE1-related autosomal recessive cerebellar ataxia (also known as autosomal recessive cerebellar ataxia type 1 or ARCA1) [MIM: 610743] | cerebellar ataxia                                                                                                                                                                          |
| 16                                     | 48  | <i>SYNE1</i> | p.Trp2646*     | LP            | U              | SYNE1-related autosomal recessive cerebellar ataxia (also known as autosomal recessive cerebellar ataxia type 1 or ARCA1) [MIM: 610743] | Ataxia, CoQ10 Deficiency, mitochondrial disorder, cerebellar atrophy                                                                                                                       |
| 16                                     | 48  | <i>SYNE1</i> | p.Arg6684*     | LP            | U              | SYNE1-related autosomal recessive cerebellar ataxia (also known as autosomal recessive cerebellar ataxia                                | Ataxia, CoQ10 Deficiency, mitochondrial disorder, cerebellar atrophy                                                                                                                       |

© 2014 American Medical Association. All rights reserved.

| Patient Index | Age | Gene Name      | Protein Change | Variant Class | Inherited From | Disease Name                                                                                                                                                   | Clinical Indication*                                                                                                                                          |
|---------------|-----|----------------|----------------|---------------|----------------|----------------------------------------------------------------------------------------------------------------------------------------------------------------|---------------------------------------------------------------------------------------------------------------------------------------------------------------|
| 17            | 6   | <i>ITGA2B</i>  | p.Leu147Val    | P             | U              | type 1 or ARCA1) [MIM: 610743]<br>autosomal recessive Glanzmann thrombasthenia [MIM: 273800]                                                                   | bruising, von Willebrand disease, thrombocytopenia, platelet disorder                                                                                         |
| 17            | 6   | <i>ITGA2B</i>  | p.Ile596Thr    | P             | U              | autosomal recessive Glanzmann thrombasthenia [MIM: 273800]                                                                                                     | bruising, von Willebrand disease, thrombocytopenia, platelet disorder                                                                                         |
| 18            | 18  | <i>ATP7B</i>   | p.Asn1270Ser   | P             | U              | autosomal recessive Wilson Disease [MIM:277900]                                                                                                                | Wilson disease, liver transplantation, thrombus, pyelonephritis, hemoperitoneum, pancreatitis                                                                 |
| 18            | 18  | <i>ATP7B</i>   | p.Pro984Ala    | LP            | U              | autosomal recessive Wilson Disease [MIM:277900]                                                                                                                | Wilson disease, liver transplantation, thrombus, pyelonephritis, hemoperitoneum, pancreatitis                                                                 |
| 19            | 57  | <i>ABCA4</i>   | p.Gly863Ala    | P             | U              | autosomal recessive Stargardt Disease [MIM: 248200]                                                                                                            | macular dystrophy, foveal dystrophy, pattern dystrophy, Stargardt, macular degeneration                                                                       |
| 19            | 57  | <i>ABCA4</i>   | p.Gly1961Glu   | P             | U              | autosomal recessive Stargardt Disease [MIM: 248200]                                                                                                            | macular dystrophy, foveal dystrophy, pattern dystrophy, Stargardt, macular degeneration                                                                       |
| 20            | 0   | <i>HSD17B3</i> | p.Ser65Leu     | LP            | U              | autosomal recessive 17-beta hydroxysteroid dehydrogenase III deficiency (a.k.a. male pseudohermaphroditism with gynecomastia) [MIM: 264300]                    | 46 XY, bilateral hernias, palpable gonads, androgen insensitivity syndrome                                                                                    |
| 20            | 0   | <i>HSD17B3</i> | p.Arg80Gln     | LP            | U              | autosomal recessive 17-beta hydroxysteroid dehydrogenase III deficiency (a.k.a. male pseudohermaphroditism with gynecomastia) [MIM: 264300]                    | 46 XY, bilateral hernias, palpable gonads, androgen insensitivity syndrome                                                                                    |
| 21            | 2   | <i>ADA</i>     | p.Ala329Val    | LP            | U              | Severe combined immunodeficiency due to ADA deficiency [MIM: 102700]                                                                                           | adenosine deaminase deficiency, hepatosplenomegaly, immunodeficiency, pancytopenia, SCID                                                                      |
| 21            | 2   | <i>ADA</i>     | Splice defect  | LP            | U              | Severe combined immunodeficiency due to ADA deficiency [MIM: 102700]                                                                                           | adenosine deaminase deficiency, hepatosplenomegaly, immunodeficiency, pancytopenia, SCID                                                                      |
| 22            | 51  | <i>SPG7</i>    | p.Ala510Val    | LP            | U              | autosomal recessive spastic paraplegia type 7 [MIM: 607259]                                                                                                    | Hyper reflexia, leukodystrophy, neuropathy, spasticity, spasticity, white matter                                                                              |
| 22            | 51  | <i>SPG7</i>    | p.Ala708Lysfs  | LP            | U              | autosomal recessive spastic paraplegia type 7 [MIM: 607259]                                                                                                    | Hyper reflexia, leukodystrophy, neuropathy, spasticity, spasticity, white matter                                                                              |
| 23            | 19  | <i>DYSF</i>    | p.Ser1173*     | LP            | U              | autosomal recessive Miyoshi muscular dystrophy-1 [MIM: 254130]; autosomal recessive limb-girdle muscular dystrophy type 2B [MIM: 253601]; distal myopathy with | muscle weakness, numbness, fatigue, Myalgia, calf pain, central nucleation, myotonic dystrophy, muscular dystrophy, chest pain, asthma, loss of consciousness |

© 2014 American Medical Association. All rights reserved.

| Patient Index | Age | Gene Name     | Protein Change       | Variant Class | Inherited From | Disease Name                                                                                                                                                                                                                              | Clinical Indication*                                                                                                                                           |
|---------------|-----|---------------|----------------------|---------------|----------------|-------------------------------------------------------------------------------------------------------------------------------------------------------------------------------------------------------------------------------------------|----------------------------------------------------------------------------------------------------------------------------------------------------------------|
| 23            | 19  | <i>DYSF</i>   | p.Arg1693Gln         | LP            | U              | anterior tibial onset [MIM: 606768]<br>autosomal recessive Miyoshi muscular dystrophy-1 [MIM: 254130]; autosomal recessive limb-girdle muscular dystrophy type 2B [MIM: 253601]; distal myopathy with anterior tibial onset [MIM: 606768] | muscle weakness, numbness, fatigue, Myalgia, calf pain , central nucleation, myotonic dystrophy, muscular dystrophy, chest pain, asthma, loss of consciousness |
| 24            | 35  | <i>ANO5</i>   | p.Asn52Ser           | LP            | U              | autosomal recessive limb-girdle muscular dystrophy type 2L [MIM: 611397]                                                                                                                                                                  | myopathy, muscle aches, myalgia                                                                                                                                |
| 24            | 35  | <i>ANO5</i>   | p.Asn64Lys*15        | LP            | U              | autosomal recessive limb-girdle muscular dystrophy type 2L [MIM: 611397]                                                                                                                                                                  | myopathy, muscle aches, myalgia                                                                                                                                |
| 25            | 29  | <i>RYR1</i>   | p.Arg2241*           | LP            | U              | autosomal recessive congenital neuromuscular disease; central core disease [MIM: 117000]                                                                                                                                                  | muscular dystrophy, myopathy, muscle weakness, central core disease, minicore disease                                                                          |
| 25            | 29  | <i>RYR1</i>   | p.Asp708Asn          | V             | U              | autosomal recessive congenital neuromuscular disease; central core disease [MIM: 117000]                                                                                                                                                  | muscular dystrophy, myopathy, muscle weakness, central core disease, minicore disease                                                                          |
| 25            | 29  | <i>RYR1</i>   | p.Arg1999Cys         | V             | U              | autosomal recessive congenital neuromuscular disease; central core disease [MIM: 117000]                                                                                                                                                  | muscular dystrophy, myopathy, muscle weakness, central core disease, minicore disease                                                                          |
| 26            | 59  | <i>DYSF</i>   | Splice defect        | LP            | U              | limb-girdle muscular dystrophy type 2B [MIM: 253601]                                                                                                                                                                                      | muscular dystrophy, muscle weakness, muscular atrophy, muscle atrophy                                                                                          |
| 26            | 59  | <i>DYSF</i>   | p.Lys1526Thr         | LP            | U              | limb-girdle muscular dystrophy type 2B [MIM: 253601]                                                                                                                                                                                      | muscular dystrophy, muscle weakness, muscular atrophy, muscle atrophy                                                                                          |
| 27            | 36  | <i>MRE11A</i> | p.Pro166Leu          | LP            | U              | autosomal recessive ataxia-telangiectasia-like disorder [MIM: 604391]                                                                                                                                                                     | Ataxia, developmental delay, oculomotor apraxia, involuntary movements, chorea, myoclonus                                                                      |
| 27            | 36  | <i>MRE11A</i> | p.Leu56Phe           | LP            | U              | autosomal recessive ataxia-telangiectasia-like disorder [MIM: 604391]                                                                                                                                                                     | Ataxia, developmental delay, oculomotor apraxia, involuntary movements, chorea, myoclonus                                                                      |
| 28            | 4   | <i>DOK7</i>   | p.Ser422Hisfs*3<br>4 | LP            | U              | autosomal recessive fetal akinesia deformation sequence [MIM: 208150]; familial limb-girdle myasthenia [MIM: 254300]                                                                                                                      | muscle weakness, ptosis, gross motor delays, myopathy, hypotonia, muscular dystrophy                                                                           |
| 28            | 4   | <i>DOK7</i>   | p.Ser422Leufs*9<br>7 | LP            | U              | autosomal recessive fetal akinesia deformation sequence [MIM: 208150]; familial limb-girdle myasthenia [MIM: 254300]                                                                                                                      | muscle weakness, ptosis, gross motor delays, myopathy, hypotonia, muscular dystrophy                                                                           |
| 29            | 54  | <i>DOK7</i>   | Splice defect        | P             | U              | autosomal recessive familial limb-                                                                                                                                                                                                        | muscle weakness, myopathy, muscular                                                                                                                            |

© 2014 American Medical Association. All rights reserved.

| Patient Index | Age | Gene Name    | Protein Change   | Variant Class | Inherited From | Disease Name                                                                                                                                                                                                                                                                                                                                                              | Clinical Indication*                                                                                                                                                                     |
|---------------|-----|--------------|------------------|---------------|----------------|---------------------------------------------------------------------------------------------------------------------------------------------------------------------------------------------------------------------------------------------------------------------------------------------------------------------------------------------------------------------------|------------------------------------------------------------------------------------------------------------------------------------------------------------------------------------------|
| 29            | 54  | <i>DOK7</i>  | p.Ala378Serfs*30 | P             | U              | girdle myasthenia [MIM: 254300]<br>autosomal recessive familial limb-girdle myasthenia [MIM: 254300]                                                                                                                                                                                                                                                                      | dystrophy, orthopnea, dyspnea on exertion, dysarthria, myasthenia gravis<br>muscle weakness, myopathy, muscular dystrophy, orthopnea, dyspnea on exertion, dysarthria, myasthenia gravis |
| 30            | 62  | <i>CAPN3</i> | p.Glu107*        | P             | U              | autosomal recessive limb-girdle muscular dystrophy (LGMD) type 2A [MIM: 253600]                                                                                                                                                                                                                                                                                           | muscular dystrophy, muscle weakness                                                                                                                                                      |
| 30            | 62  | <i>CAPN3</i> | p.Arg440Gln      | P             | U              | autosomal recessive limb-girdle muscular dystrophy (LGMD) type 2A [MIM: 253600]                                                                                                                                                                                                                                                                                           | muscular dystrophy, muscle weakness                                                                                                                                                      |
| 31            | 12  | <i>CHKB</i>  | p.Gln51*         | LP            | U              | autosomal recessive congenital muscular dystrophy (megaconial type) [MIM: 602541]                                                                                                                                                                                                                                                                                         | muscular dystrophy, muscle weakness, alpha sarcoglycanopathy, developmental delay, short stature                                                                                         |
| 31            | 12  | <i>CHKB</i>  | p.Glu283Lys      | LP            | U              | autosomal recessive congenital muscular dystrophy (megaconial type) [MIM: 602541]                                                                                                                                                                                                                                                                                         | muscular dystrophy, muscle weakness, alpha sarcoglycanopathy, developmental delay, short stature                                                                                         |
| 31            | 12  | <i>CHKB</i>  | p.Thr301Ile      | V             | U              | autosomal recessive congenital muscular dystrophy (megaconial type) [MIM: 602541]                                                                                                                                                                                                                                                                                         | muscular dystrophy, muscle weakness, alpha sarcoglycanopathy, developmental delay, short stature                                                                                         |
| 32            | 57  | <i>POLG</i>  | p.Gly11Asp       | LP            | U              | Mitochondrial DNA depletion syndrome 4A (Alpers type) [MIM: 203700]; Mitochondrial DNA depletion syndrome 4B (MNGIE type) [MIM: 613662]; Mitochondrial recessive ataxia syndrome (includes SANDO and SCAE) [MIM: 607459]; Progressive external ophthalmoplegia, autosomal dominant [MIM: 157640]; Progressive external ophthalmoplegia, autosomal recessive [MIM: 258450] | numbness, paresthesias, neuropathy, demyelination                                                                                                                                        |
| 32            | 57  | <i>POLG</i>  | p.Arg852Cys      | LP            | U              | Mitochondrial DNA depletion syndrome 4A (Alpers type) [MIM: 203700]; Mitochondrial DNA depletion syndrome 4B (MNGIE type) [MIM: 613662]; Mitochondrial recessive ataxia syndrome (includes SANDO and SCAE) [MIM: 607459]; Progressive external                                                                                                                            | numbness, paresthesias, neuropathy, demyelination                                                                                                                                        |

| Patient Index       | Age | Gene Name | Protein Change  | Variant Class | Inherited From | Disease Name                                                                                                               | Clinical Indication*                                                                                                                                                                                                                                                                                                                                                                                                                                                                                             |
|---------------------|-----|-----------|-----------------|---------------|----------------|----------------------------------------------------------------------------------------------------------------------------|------------------------------------------------------------------------------------------------------------------------------------------------------------------------------------------------------------------------------------------------------------------------------------------------------------------------------------------------------------------------------------------------------------------------------------------------------------------------------------------------------------------|
| 33                  | 37  | SACS      | p.Arg3875His    | LP            | U              | ophthalmoplegia, autosomal dominant [MIM: 157640]; Progressive external ophthalmoplegia, autosomal recessive [MIM: 258450] | neuropathy, ataxia, myelopathy, spasticity, nystagmus, lysosomal storage disorder, very long chain fatty acid disorder, metabolic disorder, Charcot-Marie-Tooth                                                                                                                                                                                                                                                                                                                                                  |
| 33                  | 37  | SACS      | p.Arg2426*      | P             | U              | autosomal recessive spastic ataxia Charlevoix-Saguenay type (ARSACS) [MIM: 270550]                                         | neuropathy, ataxia, myelopathy, spasticity, nystagmus, lysosomal storage disorder, very long chain fatty acid disorder, metabolic disorder, Charcot-Marie-Tooth                                                                                                                                                                                                                                                                                                                                                  |
| 34                  | 20  | ASS1      | p.Arg307Cys     | LP            | U              | autosomal recessive citrullinemia [MIM: 215700]                                                                            | Citrullinemia, developmental delay, seizures, spasticity, tremor, ataxia                                                                                                                                                                                                                                                                                                                                                                                                                                         |
| 34                  | 20  | ASS1      | see eTable 3    |               |                | autosomal recessive citrullinemia [MIM: 215700]                                                                            | Citrullinemia, developmental delay, seizures, spasticity, tremor, ataxia                                                                                                                                                                                                                                                                                                                                                                                                                                         |
| <b>Heterozygous</b> |     |           |                 |               |                |                                                                                                                            |                                                                                                                                                                                                                                                                                                                                                                                                                                                                                                                  |
| 35                  | 73  | C1QTNF5   | p.Ser163Arg     | LP            | U              | late onset retinal degeneration (LORD) [MIM:605670]                                                                        | night blindness, central atrophy, color vision distortion, cone rod dystrophy, macular dystrophy, retinitis pigmentosa                                                                                                                                                                                                                                                                                                                                                                                           |
| 36                  | 0   | NOTCH1    | p.Glu794SerfsX8 | LP            | U              | Aortic valve disease [MIM: 109730]                                                                                         | cardiomyopathy, atrial septal defect, ventricular septal defect, heart defect, heart failure, RASopathy, Costello syndrome, Noonan syndrome, Capillary malformation-arteriovenous malformation, Autoimmune lymphoproliferative syndrome, Hereditary Gingival fibromatosis type 1, Legius syndrome, LEOPARD syndrome, Neuro-cardio-facial-cutaneous syndromes, Neurofibromatosis type 1, pulmonic stenosis, parachute mitral valve, heart murmur, bicuspid aortic valve, bilateral pleural effusion, cardiomegaly |
| 37                  | 15  | MYBPC3    | Splice Defect   | LP            | U              | dilated cardiomyopathy (DCM) [MIM: 115200]; hypertrophic cardiomyopathy (HCM) [MIM: 115197]                                | arrhythmia, cardiomyopathy, sudden unexplained death, cardiac arrest                                                                                                                                                                                                                                                                                                                                                                                                                                             |
| 38                  | 22  | PTPN11    | p.Asn58Lys      | LP            | U              | autosomal dominant Noonan Syndrome [MIM: 163950]                                                                           | Noonan                                                                                                                                                                                                                                                                                                                                                                                                                                                                                                           |

© 2014 American Medical Association. All rights reserved.

| Patient Index | Age | Gene Name | Protein Change | Variant Class | Inherited From | Disease Name                                                                                                                                                                                                                                                                                                                                            | Clinical Indication*                                                                                                                                                                                             |
|---------------|-----|-----------|----------------|---------------|----------------|---------------------------------------------------------------------------------------------------------------------------------------------------------------------------------------------------------------------------------------------------------------------------------------------------------------------------------------------------------|------------------------------------------------------------------------------------------------------------------------------------------------------------------------------------------------------------------|
| 39            | 69  | SCN5A     | p.Arg523Cys    | LP            | U              | Atrial fibrillation, familial, 10 [MIM: 614022]; Brugada syndrome 1 [MIM: 601144]; Cardiomyopathy, dilated, 1E [MIM: 601154]; Heart block, nonprogressive [MIM: 113900]; Heart block, progressive, type IA [MIM: 113900]; Long QT syndrome-3 [MIM: 603830]; Sick sinus syndrome 1 [MIM: 608567]; Ventricular fibrillation, familial, 1 [MIM: 603829]    | cardiomyopathy, pulmonary hypertension, hyperlipidemia, hypertension, chronic renal insufficiency, heart failure, ventricular tachycardia, sudden cardiac death, Atrial flutter, Hyperthyroidism, Colonic polyps |
| 40            | 32  | MYH7      | p.Met515Thr    | LP            | U              | Cardiomyopathy, dilated, 1S [MIM: 613426]; Cardiomyopathy, familial hypertrophic, 1 [MIM: 192600]; Laing distal myopathy [MIM: 160500]; Left ventricular noncompaction 5 [MIM: 613426]; Myopathy, myosin storage [MIM: 608358]; Scapuloperoneal syndrome, myopathic type [MIM: 181430]                                                                  | cardiomyopathy, subpleural cysts, atrial fibrillation, pleural effusion, hypotonia, hypovolemia, Syndrome of inappropriate antidiuretic hormone secretion                                                        |
| 41            | 4   | BCOR      | p.Gln1337*     | LP            | U              | oculofaciocardiodental (OFCD) syndrome [MIM: 300166]                                                                                                                                                                                                                                                                                                    | cataracts, macrocephaly, atrial septal defect, patent ductus arteriosus, cleft palate, oculofaciocardiodental, microphthalmia, Simpson Golabi Behmel Syndrome                                                    |
| 42            | 46  | MYLK      | p.Asp717Tyr    | LP            | U              | autosomal dominant familial thoracic aortic aneurysm type 7 [MIM: 613780]                                                                                                                                                                                                                                                                               | thoracic aorta aneurysms, Marfan, thoracic aortic aneurysm, dissection                                                                                                                                           |
| 43            | 36  | TNXB      | p.Asp2025Val   | LP            | U              | autosomal dominant Ehlers-Danlos syndrome, hypermobility type [MIM: 130020]                                                                                                                                                                                                                                                                             | joint hypermobility, joint mobility, skin elasticity, gastrointestinal, skeletal pain, Ehlers-Danlos, musculoskeletal                                                                                            |
| 44            | 31  | MPZ       | p.Pro151Thr    | LP            | U              | Charcot-Marie-Tooth disease, dominant intermediate D [MIM: 607791]; Charcot-Marie-Tooth disease, type 1B [MIM: 118200]; Charcot-Marie-Tooth disease, type 2I [MIM: 607677]; Charcot-Marie-Tooth disease, type 2J [MIM: 607736]; Dejerine-Sottas disease [MIM: 145900]; Neuropathy, congenital hypomyelinating [MIM: 605253]; Roussy-Levy syndrome [MIM: | neuropathy, foot drop, gait abnormality, atrophy, muscle weakness, Kennedy's disease, fasciculation, muscle twitch, anorgasmia, Charcot-Marie-Tooth                                                              |



| Patient Index | Age | Gene Name       | Protein Change | Variant Class | Inherited From | Disease Name                                                                                                                                                                                | Clinical Indication*                                                                                                                                                                                       |
|---------------|-----|-----------------|----------------|---------------|----------------|---------------------------------------------------------------------------------------------------------------------------------------------------------------------------------------------|------------------------------------------------------------------------------------------------------------------------------------------------------------------------------------------------------------|
| 45            | 35  | <i>TNFRSF1A</i> | p.Arg121Gln    | P             | U              | 180800]<br>autosomal dominant familial periodic fever [MIM: 142680]                                                                                                                         | fatigue, cramp, carnitine deficiency, TNF Receptor Associated Periodic syndrome, TRAPS, shortness of breath, muscle pain, thyroid resistance, mitochondrial, periodic fever syndrome                       |
| 46            | 55  | <i>GIGYF2</i>   | p.Ala793Val    | LP            | U              | autosomal dominant Parkinson Disease type 11 [MIM: 607688]                                                                                                                                  | Akathisia, bradykinesia, bulbar, cognitive decline, drooling, dystonia, emotional lability, gait freezing, mask facies, Parkinson, psychomotor, speech loss, swallowing, supranuclear palsy, vertical gaze |
| 47            | 40  | <i>TGFBR2</i>   | p.Tyr470Asp    | LP            | U              | autosomal dominant Loeys-Dietz syndrome [MIM: 610168, 610380]                                                                                                                               | Marfan, scoliosis, aneurysms, osteoarthritis, hypoplastic ovary, absent ovary, retinal detachment, arthritis, osteoporosis, long extremities, Loeys-Dietz syndrome                                         |
| 48            | 37  | <i>DHTKD1</i>   | p.Arg834*      | LP            | U              | 2-aminoadipic 2-oxoadipic aciduria [MIM: 204750]; Charcot-Marie-Tooth disease, axonal, type 2Q [MIM: 615025]                                                                                | muscle cramps, muscle spasms, calf atrophy, neuropathy, charcot-marie-tooth, footdrop, diffuse sensorimotor demyelinating neuropathy                                                                       |
| 49            | 1   | <i>MAP3K1</i>   | p.Pro257Leu    | LP            | U              | 46XY sex reversal type 6 [MIM: 613762]                                                                                                                                                      | karyotype 46XY, sexual development, hypospadias, penoscrotal transposition, bifid scrotum, undescended testis                                                                                              |
| 50            | 21  | <i>GATA2</i>    | p.Asn371Lys    | LP            | U              | Emberger syndrome [MIM: 614038]; Immunodeficiency 21 [MIM: 614172]                                                                                                                          | pancytopenia, fanconi anemia, dyskeratosis, Shwachman-Diamond syndrome, Myelodysplastic syndrome, cancer susceptibility                                                                                    |
| 51            | 38  | <i>VCP</i>      | p.Arg155Gly    | LP            | U              | Amyotrophic lateral sclerosis 14, with or without frontotemporal dementia [MIM: 613954]; Inclusion body myopathy with early-onset Paget disease and frontotemporal dementia 1 [MIM: 167320] | muscular dystrophy, twitch, weakness, waddling gait, myopathy                                                                                                                                              |
| 52            | 63  | <i>SPAST</i>    | p.Asp542Gly    | LP            | U              | autosomal dominant spastic paraplegia type 4 [MIM: 182601]                                                                                                                                  | weakness, spinal muscular atrophy, motor neuron disease                                                                                                                                                    |
| 53            | 46  | <i>DNMT1</i>    | p.Tyr511Cys    | LP            | U              | autosomal dominant hereditary sensory neuropathy type E1 [MIM: 614116]                                                                                                                      | ataxia, hearing loss, deafness, neuropathy, dementia, spasticity, cerebellar atrophy                                                                                                                       |
| 54            | 24  | <i>SCN5A</i>    | p.Ser1710Leu   | LP            | U              | autosomal dominant Brugada syndrome-1 [MIM: 601144]                                                                                                                                         | Cardiac arrhythmia, syncope, Brugada, vaso-vagal syndrome                                                                                                                                                  |
| 55            | 0   | <i>COL1A2</i>   | p.Gly1012Ser   | LP            | U              | autosomal dominant osteogenesis imperfecta (OI), type II [MIM:                                                                                                                              | Congenital anomalies, skeletal dysplasia, dysmorphic features, femurs, osteopenia,                                                                                                                         |

© 2014 American Medical Association. All rights reserved.

| Patient Index | Age | Gene Name | Protein Change   | Variant Class | Inherited From | Disease Name                                                                                                                      | Clinical Indication*                                                                                                                                                                                                                                                                                                                                                         |
|---------------|-----|-----------|------------------|---------------|----------------|-----------------------------------------------------------------------------------------------------------------------------------|------------------------------------------------------------------------------------------------------------------------------------------------------------------------------------------------------------------------------------------------------------------------------------------------------------------------------------------------------------------------------|
|               |     |           |                  |               |                | 166210]; OI, type III [MIM: 259420]; OI, type IV [MIM: 166220]; autosomal dominant Ehlers-Danlos syndrome type VIIB [MIM: 130060] | oligohydramnios, osteogenesis imperfecta, diaphyseal disorder                                                                                                                                                                                                                                                                                                                |
| 56            | 14  | UBE3A     | p.Leu825Phefs*15 | LP            | U              | autosomal dominant Angelman syndrome [MIM: 105830]                                                                                | developmental delay, poor balance, wide-based gait, abnormal gait, cerebral palsy                                                                                                                                                                                                                                                                                            |
| 57            | 48  | TP53      | p.Arg158His      | P             | U              | autosomal dominant Li-Fraumeni Syndrome [MIM: 151623]                                                                             | cerebellar ependymoma, cancer susceptibility, Li-Fraumeni syndrome                                                                                                                                                                                                                                                                                                           |
| 58            | 44  | SDHD      | p.Pro81Leu       | P             | U              | autosomal dominant hereditary paraganglioma type 1 [MIM: 168000]                                                                  | paraganglioma, papillary thyroid cancer, bowel incontinence, fatigue, tremors, fibroids, Von Hippel-Lindau syndrome, Multiple endocrine neoplasia type 2, Cowden syndrome, Li Fraumeni syndrome, cancer susceptibility                                                                                                                                                       |
| 59            | 58  | SDHB      | p.Arg90*         | P             | U              | autosomal dominant paragangliomas [MIM: 115310]                                                                                   | paraganglioma, Von Hippel-Lindau syndrome, Multiple endocrine neoplasia type 2, Cowden syndrome, Li Fraumeni syndrome, cancer susceptibility                                                                                                                                                                                                                                 |
| 60            | 3   | PTPN11    | p.Asn308Asp      | P             | U              | autosomal dominant Noonan Syndrome 1 [MIM: 163950]                                                                                | developmental delay, colobomas, supraaortic stenosis, supraaortic aortic stenosis, short stature, CHARGE, growth hormone insensitivity, nystagmus                                                                                                                                                                                                                            |
| 61            | 8   | KRT16     | p.Gln122Arg      | LP            | U              | autosomal dominant pachyonychia congenita [MIM: 167200]                                                                           | heart defect, bicuspid aortic valve, aortic dilation, dilated aorta, hyperhidrosis, nail dystrophy, dental anomalies, Odonto-onycho-dermal dysplasia, dyskeratosis congenita                                                                                                                                                                                                 |
| 62            | 0   | EFTUD2    | Splice Defect    | LP            | U              | autosomal dominant mandibulofacial dysostosis, Guion-Almeida type [MIM: 610536]                                                   | congenital anomalies, dysmorphic features, microcephaly, plagiocephaly, microretrognathia, hemivertebra, limb anomalies, esophageal atresia, inguinal hernia, respiratory failure, choanal atresia, cerebral atrophy, developmental delay, cryptorchidism, malar hypoplasia, Vater syndrome, Nager syndrome, Treacher Collins syndrome, Renpenning syndrome, Charge syndrome |
| 63            | 49  | NOTCH3    | p.Arg1231Cys     | P             | U              | autosomal dominant cerebral arteriopathy with subcortical infarcts; leukoencephalopathy [MIM: 125310]                             | ataxia, white matter changes, leukodystrophy, neuropathy, dementia, cognitive decline, vision loss                                                                                                                                                                                                                                                                           |
| 64            | 0   | NR5A1     | p.Tyr404Asp      | P             | U              | 46XY sex reversal 3 [MIM: 612965]; Adrenocortical insufficiency;                                                                  | disorder of sexual development, XY female                                                                                                                                                                                                                                                                                                                                    |

© 2014 American Medical Association. All rights reserved.

| Patient Index              | Age | Gene Name      | Protein Change   | Variant Class | Inherited From | Disease Name                                                                                                                                                                                                    | Clinical Indication*                                                                                                                                                                                                   |
|----------------------------|-----|----------------|------------------|---------------|----------------|-----------------------------------------------------------------------------------------------------------------------------------------------------------------------------------------------------------------|------------------------------------------------------------------------------------------------------------------------------------------------------------------------------------------------------------------------|
| 65                         | 68  | <i>FLCN</i>    | p.His429Thrfs*39 | P             | U              | Premature ovarian failure 7 [MIM: 612964]; Spermatogenic failure 8 [MIM: 613957]<br>autosomal dominant Birt-Hogg-Dube syndrome [MIM: 135150]; autosomal dominant primary spontaneous pneumothorax [MIM: 173600] | cancer susceptibility, Li Fraumeni, Lynch, Familial adenomatous polyposis, Cowden syndrome, bullous emphysema, lung hamartoma                                                                                          |
| 66                         | 55  | <i>SPAST</i>   | p.Arg562Gln      | P             | U              | autosomal dominant spastic paraplegia 4 [MIM: 182601]                                                                                                                                                           | spasticity, Spastic paraparesis                                                                                                                                                                                        |
| 67                         | 8   | <i>FGF23</i>   | p.Gly87Asp       | LP            | U              | autosomal dominant hyperphosphatemic familial tumoral calcinosis [MIM: 211900]                                                                                                                                  | developmental delay, seizures, esotropia, amblyopia, anisometropia, vitreous hemorrhages, liver failure, cholestasis, Calcinosis, hypertrophy, obsessive compulsive disorder, Attention deficit hyperactivity disorder |
| 68                         | 13  | <i>PCDH19</i>  | p.Ala153Ile      | LP            | U              | X-linked female-restricted early infantile epileptic encephalopathy type 9 (EIEE9) or Juberg-Hellman Syndrome [MIM: 300088]                                                                                     | epilepsy, seizures, learning disability, growth delay, bone age                                                                                                                                                        |
| 69                         | 26  | <i>GATA2</i>   | p.Tyr376Profs*9  | P             | U              | autosomal dominant Emberger syndrome [MIM: 614038]                                                                                                                                                              | neutropenia, hearing loss, deafness, papillary thyroid cancer, cancer susceptibility                                                                                                                                   |
| 70                         | 49  | <i>CACNA1A</i> | p.Asp302Asn      | LP            | U              | autosomal dominant spinocerebellar ataxia-6 [MIM:183086]; episodic ataxia type 2 [MIM:108500]; familial hemiplegic migraine-1 with progressive cerebellar ataxia [MIM:141500]                                   | ataxia, nystagmus, diabetes                                                                                                                                                                                            |
| <b>&gt;2 LP/P reported</b> |     |                |                  |               |                |                                                                                                                                                                                                                 |                                                                                                                                                                                                                        |
| 71                         | 29  | <i>AR</i>      | p.Pro392Ser      | P             | U              | X-linked recessive partial Androgen insensitivity syndrome [MIM: 312300]; X-linked recessive hypospadias [MIM: 300633]                                                                                          | neuropathy, Charcot-Marie-Tooth, gait disturbance                                                                                                                                                                      |
| 71                         | 29  | <i>GDAP1</i>   | p.Met116Thr      | LP            | U              | autosomal recessive Charcot-Marie-Tooth disease [MIM: 607831, 607706, 608340,; 21440]                                                                                                                           | neuropathy, Charcot-Marie-Tooth, gait disturbance                                                                                                                                                                      |
| 71                         | 29  | <i>GDAP1</i>   | p.Asp21Alafs*23  | P             | U              | autosomal recessive Charcot-Marie-Tooth disease [MIM: 607831, 607706, 608340,; 21440]                                                                                                                           | neuropathy, Charcot-Marie-Tooth, gait disturbance                                                                                                                                                                      |
| <b>Trio-CES</b>            |     |                |                  |               |                |                                                                                                                                                                                                                 |                                                                                                                                                                                                                        |

| Patient Index  | Age | Gene Name     | Protein Change | Variant Class | Inherited From | Disease Name                                                                                                                | Clinical Indication*                                                                                                                                                                                                                                                                                                                                                                                                                                                     |
|----------------|-----|---------------|----------------|---------------|----------------|-----------------------------------------------------------------------------------------------------------------------------|--------------------------------------------------------------------------------------------------------------------------------------------------------------------------------------------------------------------------------------------------------------------------------------------------------------------------------------------------------------------------------------------------------------------------------------------------------------------------|
| <b>De novo</b> |     |               |                |               |                |                                                                                                                             |                                                                                                                                                                                                                                                                                                                                                                                                                                                                          |
| 72             | 0   | <i>TCF4</i>   | Splice defect  | LP            | De novo        | Pitt-Hopkins Syndrome [MIM: 610954]                                                                                         | developmental delay, hypertonia, elevated lactate, hypotonia, cerebral palsy, constipation, gastrointestinal motility, hirschsprung, arginase deficiency, angelman syndrome, fragile X                                                                                                                                                                                                                                                                                   |
| 73             | 24  | <i>COL6A2</i> | p.Gly699Asp    | LP            | De novo        | Bethlem myopathy [MIM: 158810]; Myosclerosis, congenital [MIM: 255600]; Ullrich congenital muscular dystrophy [MIM: 254090] | muscular weakness, muscular atrophy, muscular, hypertrophic, spinal muscular atrophy, Charcot-Marie-Tooth, neuropathy, toe walking, gower's sign                                                                                                                                                                                                                                                                                                                         |
| 74             | 8   | <i>ZEB2</i>   | p.Asp978Tyr    | LP            | De novo        | Mowat-Wilson syndrome [MIM: 235730]                                                                                         | epilepsy, developmental delay, hypertonia, Lennox Gastaut syndrome, early puberty, spasticity, Nephrolithiasis, cerebellar hypometabolism, brain atrophy                                                                                                                                                                                                                                                                                                                 |
| 75             | 0   | <i>KCNT1</i>  | p.Arg474His    | P             | De novo        | malignant migrating partial seizures of infancy (MMPSI)                                                                     | epilepsy, seizures, regression of milestone, developmental delay, sulfite oxidase deficiency, creatine disorders, Dravet syndrome, pyridoxine responsive, pyridoxine dependent, folinic acid response                                                                                                                                                                                                                                                                    |
| 76             | 4   | <i>RAD21</i>  | p.Leu603Pro    | LP            | De novo        | autosomal dominant Cornelia de Lange syndrome 4 [MIM: 614701]                                                               | microcephaly, language delay, speech delay, dysmorphic features, williams syndrome, kabuki syndrome, tooth enamel, large ears, long palpebral fissure, high arched eyebrows, high arched palate, long eyelashes, clinodactyly                                                                                                                                                                                                                                            |
| 77             | 1   | <i>ACVR1</i>  | p.Arg258Gly    | LP            | De novo        | fibrodysplasia ossificans progressive (FOP) [MIM: 135100]                                                                   | Craniofacial abnormalities, deafness, dysmorphic features, macrocephaly, unilateral sensorineural hearing loss, motor delay, congenital anomalies, 4-limb digit hypoplasia, disproportionate limbs, joint restrictions, ventriculomegaly, brain stem deformity, skeletal abnormalities, ectodermal dysplasia, hydrocephalus, subcutaneous masses, storage disorder, mucopolysaccharidosis, metabolic disorder, lysosomal disorder, Fibrodysplasia ossificans progressiva |
| 78             | 0   | <i>SCN2A</i>  | p.Ser987Ile    | LP            | De novo        | early infantile epileptic encephalopathy type 11 [MIM: 613721] or benign familial infantile seizures type 3 [MIM: 607745]   | seizures, vomiting, developmental delay, otitis media                                                                                                                                                                                                                                                                                                                                                                                                                    |

| Patient Index | Age | Gene Name         | Protein Change    | Variant Class | Inherited From | Disease Name                                                                                                                      | Clinical Indication*                                                                                                                                                                                                                                                                |
|---------------|-----|-------------------|-------------------|---------------|----------------|-----------------------------------------------------------------------------------------------------------------------------------|-------------------------------------------------------------------------------------------------------------------------------------------------------------------------------------------------------------------------------------------------------------------------------------|
| 79            | 0   | <i>SCN8A</i>      | p.Arg850Gln       | LP            | De novo        | Cognitive impairment with or without cerebellar ataxia [MIM: 614306]; Epileptic encephalopathy, early infantile, 13 [MIM: 614558] | deafness, hearing impairment, developmental delay, seizures, infantile spasms                                                                                                                                                                                                       |
| 80            | 1   | <i>KRAS</i>       | p.Asp153Val       | P             | De novo        | autosomal dominant Noonan Syndrome type 3 [MIM: 609942]                                                                           | developmental delay, dysmorphic features, costello syndrome, noonan syndrome, pulmonary stenosis, astigmatism, nystagmus, undescended testicle, hypertelorism, diastasis, hypotonia                                                                                                 |
| 81            | 4   | <i>TUBB4A</i>     | p.Val255Ile       | LP            | De novo        | Dystonia 4, torsion, autosomal dominant [MIM: 128101]; Leukodystrophy, hypomyelinating, 6 [MIM: 612438]                           | developmental delay, microcephaly, truncal hypotonia, cerebellar hypoplasia, limb hypertonia, hyperreflexia, depressed nasal bridge, cerebellar atrophy, bilateral clonus of the feet, brain malformation                                                                           |
| 82            | 0   | <i>MAP2K2</i>     | p.Lys61Glu        | LP            | De novo        | autosomal dominant Cardiofaciocutaneous Syndrome (CFCS) [MIM: 115150]                                                             | Noonan, Hydrocephalus, seizures, Pulmonary artery stenosis, dysmorphic features, Heart murmur, developmental delay, ventriculomegaly                                                                                                                                                |
| 83            | 2   | <i>DYRK1A</i>     | p.Tyr104 *        | LP            | De novo        | autosomal dominant mental retardation type 7 [MIM:614104]                                                                         | developmental delay, dysmorphic features, iron deficiency, metabolic disorder, microcephaly, poor weight gain, short stature, strabismus                                                                                                                                            |
| 84            | 6   | <i>PIK3CA</i>     | p.Gly914Arg       | LP            | De novo        | megalencephaly-capillary malformation-polymicrogyria syndrome (MCAP) [MIM: 602501]                                                | Bilateral cryptorchidism, constipation, developmental delay, dolichocephaly, duplicated/bifid collecting system, dysmorphi*, hydrocephalus, hypotonia, inguinal hernia, laryngomalacia, leg length, macrocephaly, postaxial polydactyly, Simpson-Golabi-Behmel syndrome, syndactyly |
| 85            | 13  | <i>FOXP1</i>      | p.Val423His fs*37 | LP            | De novo        | intellectual disability with language impairment; autistic features [MIM: 613670]                                                 | Abnormal gait, ADHD, autism, dysmorphic features, foot drag, hypophonia, macrocephaly, mitochondrial, muscular dystrophy, neuromuscular disorder, obsessive behavior                                                                                                                |
| 86            | 4   | <i>ADAR</i>       | p.Gly1007Arg      | LP            | De novo        | autosomal dominant Aicardi-Goutieres syndrome type 6 [MIM: 615010]; dyschromatosis symmetrica hereditaria [MIM: 127400]           | paraparesis, weakness, abnormal reflex, muscle tone, coordination, spasticity, diplegia, leukodystrophy, Babinski's sign, mitochondrial                                                                                                                                             |
| 87            | 0   | <i>KMT2A(MLL)</i> | Splice defect     | LP            | De novo        | Wiedemann-Steiner syndrome [MIM: 605130]                                                                                          | developmental delay, dysmorphic features, growth retardation, hypotonia, micrognathia, microphthalmia, optic nerve coloboma, orbital                                                                                                                                                |

© 2014 American Medical Association. All rights reserved.

| Patient Index | Age | Gene Name | Protein Change | Variant Class | Inherited From | Disease Name                                                                                                                                                                            | Clinical Indication*                                                                                                                                                                                                         |
|---------------|-----|-----------|----------------|---------------|----------------|-----------------------------------------------------------------------------------------------------------------------------------------------------------------------------------------|------------------------------------------------------------------------------------------------------------------------------------------------------------------------------------------------------------------------------|
| 88            | 7   | CRX       | p.Glu42Lys     | LP            | De novo        | Cone-rod retinal dystrophy-2 [MIM: 120970]; Leber congenital amaurosis 7 [MIM: 613829]                                                                                                  | cysts, pectus excavatum, poor growth, retinal detachment, syndactyly, turned-out hands, wide fontanelle<br>Leber's congenital amaurosis, light perception, macular atrophy, nystagmus, retinal atrophy, visual acuity.       |
| 89            | 14  | HUWE1     | p.Ala1338Val   | LP            | De novo        | Turner type intellectual disability syndrome [MIM: 300706]                                                                                                                              | developmental delay, hip dysplasia, hypermobility, joint laxity, seizures, epilepsy, dysmorphic                                                                                                                              |
| 90            | 3   | SCN2A     | p.Arg853Gln    | LP            | De novo        | Epileptic encephalopathy, early infantile, 11 [MIM: 613721]; seizures, benign familial infantile, 3 [MIM: 607745]                                                                       | developmental delay, spasms, seizures, epilepsy, renal lithiasis, kidney stone, involuntary movements, rotary nystagmus, vomit, gastroesophageal reflux, feeding intolerance.                                                |
| 91            | 6   | SCN2A     | p.Glu1211Lys   | LP            | De novo        | Epileptic encephalopathy, early infantile, 11 [MIM: 613721]; seizures, benign familial infantile, 3 [MIM: 607745]                                                                       | developmental delay, epilepsy, seizures, spasms, autism, Microcephaly, wide palpebral fissures, hypertonia, mitochondrial, complex IV, cytochrome c oxidase deficiency, Rett syndrome, Lennox Gastaut                        |
| 92            | 3   | HDAC8     | Splice defect  | LP            | De novo        | X-linked dominant Cornelia de Lange Syndrome [MIM: 30882]                                                                                                                               | microcephaly, brachycephaly, developmental delay, Cornelia De Lange, asymmetric facies, short stature, low weight, brachydactyly, clinodactyly                                                                               |
| 93            | 1   | NSD1      | p.Gln784*      | LP            | De novo        | autosomal dominant Beckwith-Wiedemann syndrome [MIM: 130650]; autosomal dominant Sotos syndrome 1 [MIM: 117550]                                                                         | brain malformation, hypoxic ischemic encephalopathy, craniofacial abnormalities, developmental delay, auditory neuropathy, dysmorphic features, hypotonia, cortical vision, micrognathia, small Patent ductus arteriosus     |
| 94            | 23  | PTEN      | p.Ser287*      | LP            | De novo        | autosomal dominant PTEN hamartoma tumor syndrome including Bannayan-Riley-Ruvalcaba syndrome [MIM: 153480]; Cowden syndrome 1 [MIM: 158350]; macrocephaly/autism syndrome [MIM: 605309] | PTEN hamartoma tumor syndrome, macrocephaly, tinnitus, hearing loss, early permanent dentition, precocious puberty, cutis scarring, menorrhagia, Cowden Syndrome, collagen syndrome, kyphosis, scoliosis, balance, migraines |
| 95            | 3   | GARS      | p.Glu333Val    | LP            | De novo        | autosomal dominant Charcot-Marie-Tooth disease type 2 [MIM: 601472]; distal hereditary motor neuronopathy type V [MIM: 600794]                                                          | weakness, respiratory, myopathy, neuropathy, gait, muscular dystrophy                                                                                                                                                        |

© 2014 American Medical Association. All rights reserved.

| Patient Index | Age | Gene Name      | Protein Change    | Variant Class | Inherited From | Disease Name                                                                                                | Clinical Indication*                                                                                                                                                                                                               |
|---------------|-----|----------------|-------------------|---------------|----------------|-------------------------------------------------------------------------------------------------------------|------------------------------------------------------------------------------------------------------------------------------------------------------------------------------------------------------------------------------------|
| 96            | 0   | <i>KAT6B</i>   | p.Gln1321Argfs*20 | LP            | De novo        | autosomal dominant Say-Barber-Biesecker-Young-Simpson Syndrome (SBBYSS) [MIM: 603736]                       | CHARGE syndrome, multiple congenital anomalies, nasolacrimal duct obstruction, ear anomaly, heart murmur, hypotonia, hydronephrosis, microcephaly, Simian crease, Myasthenia gravis                                                |
| 97            | 21  | <i>CHD8</i>    | p.Arg773*         | LP            | De novo        | autism type 18 [MIM: 615032]                                                                                | autism, scoliosis, thyroid, learning disabilities, dysmorphic features, tall stature, epicanthal folds, palpebral fissures, thin nasal bridge, high-arched palate, narrow facies, long thin fingers, toes                          |
| 98            | 2   | <i>DYRK1A</i>  | p.Lys188Ile       | LP            | De novo        | intellectual disability type 7 [MIM: 614104]                                                                | developmental delay, microcephaly, dysmorphic features, hypertonia, micrognathia, spasticity, clinodactyly, tapering fingers                                                                                                       |
| 99            | 12  | <i>ITPR1</i>   | p.Ser277Ile       | LP            | De novo        | Spinocerebellar ataxia 15 [MIM: 606658]; Spinocerebellar ataxia 29, congenital nonprogressive [MIM: 117360] | brain malformation, cerebellar hypoplasia, developmental delay, ataxia, dysmetria, vermian hypoplasia, strabismus, constipation                                                                                                    |
| 100           | 36  | <i>PSEN1</i>   | p.Leu381Val       | P             | De novo        | autosomal dominant early onset dementia with or without spastic paraparesis [MIM: 607822]                   | spasticity, cognitive decline, increased tone, hypertonia, increased reflexes, Hyperreflexia, vision loss                                                                                                                          |
| 101           | 6   | <i>SHOC2</i>   | p.Ser2Gly         | LP            | De novo        | Noonan syndrome-like disorder with loose anagen hair [MIM: 607721]                                          | Short stature, macrocephaly, hypotonia, motor delay, speech delay, eczema, bulging fontanel, heart defect, dysmorphic features, bathrocephaly, skeletal dysplasia, hypochondroplasia                                               |
| 102           | 1   | <i>ZEB2</i>    | p.Leu727Tyrfs*7   | LP            | De novo        | Mowat-Wilson syndrome [MIM: 235730]                                                                         | developmental delay, hypotonia, heart disease, growth delay, Mowat-Wilson syndrome, constipation, tachycardia, hypospadias, dysmorphic features, Kleefstra syndrome, cortical blindness, visual impairment, postural abnormalities |
| 103           | 2   | <i>NR2F1</i>   | p.Cys128Arg       | LP            | De novo        | Bosch-Boonstra-Schaaf optic atrophy syndrome [MIM: 615722]                                                  | autism, developmental delay, spasms, seizures, failure to thrive, sensorineural hearing loss, microtia                                                                                                                             |
| 104           | 14  | <i>KCNMA1</i>  | p.Thr352Ala       | LP            | De novo        | generalized epilepsy; paroxysmal dyskinesia [MIM: 609446]                                                   | developmental delay, seizures, hypotonia, scoliosis, cerebral palsy, neuromuscular                                                                                                                                                 |
| 105           | 2   | <i>SYNGAP1</i> | p.Arg299Profs*48  | P             | De novo        | autosomal dominant intellectual disability type 5 [MIM: 612621]                                             | autism, developmental delay, milk intolerance, GERD                                                                                                                                                                                |
| 106           | 17  | <i>GRIN2B</i>  | p.Arg682Cys       | P             | De novo        | autosomal dominant intellectual disability type 6 [MIM: 613970]                                             | scoliosis, hypotonia, developmental delay, learning disability, language delay, attention                                                                                                                                          |

© 2014 American Medical Association. All rights reserved.

| Patient Index | Age | Gene Name     | Protein Change | Variant Class | Inherited From | Disease Name                                                                                                                                                                                                                                                                                                                                                    | Clinical Indication*                                                                                                                                                                                                                                             |
|---------------|-----|---------------|----------------|---------------|----------------|-----------------------------------------------------------------------------------------------------------------------------------------------------------------------------------------------------------------------------------------------------------------------------------------------------------------------------------------------------------------|------------------------------------------------------------------------------------------------------------------------------------------------------------------------------------------------------------------------------------------------------------------|
| 107           | 11  | <i>TUBB2A</i> | p.Gln291Pro    | LP            | De novo        | Cortical dysplasia, complex, with other brain malformations 5 [MIM: 615763]                                                                                                                                                                                                                                                                                     | deficit disorder<br>developmental delay, short stature, seizures, ureteropelvic junction obstruction, constipation, hydronephrosis, clinodactyly, growth hormone deficiency, Russell Silver syndrome                                                             |
| 108           | 5   | <i>KCNT1</i>  | p.Arg464His    | P             | De novo        | autosomal dominant early infantile epileptic encephalopathy [MIM: 61459]; autosomal dominant nocturnal frontal lobe epilepsy 5 [MIM: 615005]                                                                                                                                                                                                                    | developmental delay, cortical blindness, seizures, cerebral palsy                                                                                                                                                                                                |
| 109           | 4   | <i>MPZ</i>    | p.Gly167Arg    | P             | De novo        | Charcot-Marie-Tooth disease, dominant intermediate D [MIM: 607791]; Charcot-Marie-Tooth disease, type 1B [MIM: 118200]; Charcot-Marie-Tooth disease, type 2I [MIM: 607677]; Charcot-Marie-Tooth disease, type 2J [MIM: 607736]; Dejerine-Sottas disease [MIM: 145900]; Neuropathy, congenital hypomyelinating [MIM: 605253]; Roussy-Levy syndrome [MIM: 180800] | charcot marie tooth, neuropathy                                                                                                                                                                                                                                  |
| 110           | 13  | <i>HSPD1</i>  | p.Ala536Val    | LP            | De novo        | autosomal dominant spastic paraplegia 13 [MIM: 605280]; autosomal recessive hypomyelinating leukodystrophy 4 [MIM: 612233]                                                                                                                                                                                                                                      | ataxia, white matter disease, nystagmus, hypomyelination, Pelizaeus Merzbacher disease, mitochondrial encephalopathy, myopia, astigmatism                                                                                                                        |
| 111           | 0   | <i>KCNQ2</i>  | p.Gly281Trp    | P             | De novo        | autosomal dominant early infantile epileptic encephalopathy-7 [MIM: 613720]                                                                                                                                                                                                                                                                                     | seizures, encephalopathy, dysmorphic features, metabolic disorders, thin corpus callosum, pectus excavatum, dermal melanosis, carnitine deficiency, hypotonia, congenital disorder of glycosylation, peroxisomal disorder, Zellweger, lysosomal storage disorder |
| 112           | 17  | <i>CAMTA1</i> | p.Tyr1077Cys   | LP            | De novo        | autosomal dominant nonprogressive cerebellar ataxia with intellectual disability [MIM: 614756]                                                                                                                                                                                                                                                                  | autism, developmental delay, catatonia, psychosis, attention deficit disorder                                                                                                                                                                                    |
| 113           | 1   | <i>TUBB2A</i> | p.Ile345Phe    | LP            | De novo        | Cortical dysplasia, complex, with other brain malformations 5 [MIM: 615763]                                                                                                                                                                                                                                                                                     | developmental delay, epilepsy, seizures, infantile spasms, perisylvian polymicrogyria, microcephaly, plagiocephaly                                                                                                                                               |

© 2014 American Medical Association. All rights reserved.



| Patient Index | Age | Gene Name      | Protein Change   | Variant Class | Inherited From | Disease Name                                                                                                         | Clinical Indication*                                                                                                                                                                                                                                 |
|---------------|-----|----------------|------------------|---------------|----------------|----------------------------------------------------------------------------------------------------------------------|------------------------------------------------------------------------------------------------------------------------------------------------------------------------------------------------------------------------------------------------------|
| 114           | 13  | <i>ATP1A3</i>  | p.Gly325Asp      | LP            | De novo        | autosomal dominant dystonia 12 [MIM: 128235]; autosomal dominant alternating hemiplegia of childhood 2 [MIM: 614820] | developmental delay, ataxia, seizures, spasticity, cerebellar atrophy, strabismus, exotropia, legally blind, dysmorphic features, ankyloglossia                                                                                                      |
| 115           | 5   | <i>CHD8</i>    | p.Arg582*        | LP            | De novo        | autosomal dominant susceptibility to autism type 18 [MIM: 615032]                                                    | autism, developmental delay, muscular dystrophy, diabetes, mitochondrial                                                                                                                                                                             |
| 116           | 1   | <i>KMT2A</i>   | p.Lys1218Glufs*4 | P             | De novo        | autosomal dominant Wiedemann-Steiner syndrome [MIM: 605130]                                                          | developmental delay, torticollis, hypotonia, dysmorphic features, gastroesophageal reflux, gastrostomy, hypertrichosis, Hirsutism, mitochondria                                                                                                      |
| 117           | 14  | <i>SRCAP</i>   | p.Arg2435*       | P             | De novo        | autosomal dominant Floating-Harbor syndrome [MIM: 136140]                                                            | developmental delay, speech delay, short stature, microcephaly, dysmorphic features, ptosis, brachydactyly, Coffin-Siris syndrome, Kabuki                                                                                                            |
| 118           | 6   | <i>PTPN11</i>  | p.Asn308Asp      | P             | De novo        | autosomal dominant Noonan syndrome 1 [MIM: 163950]                                                                   | developmental delay, seizures, dysmorphic features, short stature, ptosis, pectus excavatum, cardiac defect, atrial enlargement, subarachnoid hemorrhage, myopia, constipation, RASopathy, Noonan                                                    |
| 119           | 2   | <i>SMARCA2</i> | p.His1161Arg     | LP            | De novo        | autosomal dominant Nicolaides-Baraitser syndrome [MIM: 601358]                                                       | developmental delay, seizures, dysmorphic features, microcephaly, undescended testicles, white matter changes, leukodystrophy                                                                                                                        |
| 120           | 0   | <i>KMT2D</i>   | p.Gln3759*       | P             | De novo        | autosomal dominant Kabuki syndrome [MIM: 147920]                                                                     | heart defect, cardiac defect, coarctation of the aorta, supraventricular tachycardia, duplex kidneys, gastroesophageal reflux, otitis media, hypotonia, developmental delay, Noonan, Kabuki                                                          |
| 121           | 3   | <i>TCF4</i>    | p.Gly656Argfs*55 | P             | De novo        | autosomal dominant Pitt-Hopkins syndrome [MIM: 610954]                                                               | developmental delay, hypotonia, peripheral hypertonia, leukodystrophy, white matter changes, optic atrophy, esotropia, monocular, myopia, astigmatism                                                                                                |
| 122           | 4   | <i>SMARCA2</i> | p.Asp534Tyr      | LP            | De novo        | autosomal dominant Nicolaides-Baraitser Syndrome [MIM: 601358]                                                       | developmental delay, micrognathia, nystagmus, dysmorphic features, microcephaly, Hallermann-Streiff, Cornelia de Lange Syndrome                                                                                                                      |
| 123           | 3   | <i>SATB2</i>   | p.Thr390Ile      | LP            | De novo        | autosomal dominant Glass Syndrome [MIM: 612313]                                                                      | developmental delay, dysmorphic features, microcephaly, supernumerary teeth, pyruvate dehydrogenase deficiency, myopathic face, hypotonia, neuromuscular, inguinal hernia, undescended testes, Williams syndrome, Noonan syndrome, Angelman syndrome |

| Patient Index | Age | Gene Name     | Protein Change       | Variant Class | Inherited From | Disease Name                                                                                                                                                                                          | Clinical Indication*                                                                                                                                                                                                                                                                                                            |
|---------------|-----|---------------|----------------------|---------------|----------------|-------------------------------------------------------------------------------------------------------------------------------------------------------------------------------------------------------|---------------------------------------------------------------------------------------------------------------------------------------------------------------------------------------------------------------------------------------------------------------------------------------------------------------------------------|
| 124           | 9   | <i>LMNA</i>   | Splice defect        | P             | De novo        | autosomal dominant limb-girdle muscular dystrophy [MIM: 159001], autosomal dominant congenital muscular dystrophy [MIM: 613205]; autosomal dominant Emery-Dreifuss muscular dystrophy 2 [MIM: 181350] | ataxia, muscular dystrophy, myopathy                                                                                                                                                                                                                                                                                            |
| 125           | 16  | <i>CTNNA1</i> | p.Leu424Arg          | LP            | De novo        | autosomal dominant intellectual disability 19 [MIM: 615075]                                                                                                                                           | developmental delay, microcephaly, brachycephaly, dysmorphic features, cerebral palsy, scoliosis, gait abnormality                                                                                                                                                                                                              |
| 126           | 3   | <i>CHD7</i>   | p.His1734Serfs*<br>3 | P             | De novo        | autosomal dominant CHARGE syndrome [MIM: 214800]                                                                                                                                                      | developmental delay, bicuspid aortic valve, atrial septal aneurysm, patent foramen ovale, atrial septal defect, dysmorphic features, craniofacial, gastroesophageal reflux, laryngomalacia, hearing loss, deafness, astigmatism, constipation, Otopalatodigital syndrome, CHARGE syndrome, 3M syndrome                          |
| 127           | 0   | <i>CASK</i>   | Splice defect        | P             | De novo        | X-linked dominant intellectual disability; microcephaly with pontine; cerebellar hypoplasia (MICPCH) [MIM: 300749]                                                                                    | developmental delay, nystagmus, hypotonia, pontocerebellar atrophy, pontocerebellar hypoplasia, Polymicrogyria, microcephaly, hearing loss, deafness, seizures, epilepsy                                                                                                                                                        |
| 128           | 0   | <i>KCNK9</i>  | p.Gly236Arg          | P             | De novo        | autosomal dominant Birk-Barel intellectual disability dysmorphism syndrome [MIM: 612292]                                                                                                              | developmental delay, dysmorphic features, cleft palate, craniofacial, microcephaly, retrognathia, micrognathia, hypertelorism, hypotonia, hypoglycemia, hyperinsulinemia, intrauterine growth restriction, Stickler syndrome                                                                                                    |
| 129           | 12  | <i>NSD1</i>   | p.Glu1184*           | LP            | De novo        | Sotos syndrome [MIM:117550]                                                                                                                                                                           | seizures, epilepsy, developmental delay, dysmorphic features, craniofacial abnormalities, long narrow face, large forehead, malar hypoplasia, lowset posteriorly rotated ear, epicanthal folds bilaterally, high arched palate, kyphosis, scoliosis, broad fingers, toes, joint laxity, inverted nipples, mild pectus excavatum |
| 130           | 8   | <i>MLL</i>    | p.Cys1448Arg         | LP            | De novo        | autosomal dominant Wiedemann-Steiner Syndrome [MIM: 605130]                                                                                                                                           | developmental delay, hypotonia, myopathy, ptosis, dysmorphic features, craniofacial abnormalities, hypertelorism, bulbous nose, clinodactyly, tapering fingers, downslanting palpebral fissures, wide nasal bridge,                                                                                                             |

© 2014 American Medical Association. All rights reserved.

| Patient Index     | Age | Gene Name       | Protein Change    | Variant Class | Inherited From | Disease Name                                                             | Clinical Indication*                                                                                                                                                                                                                                         |
|-------------------|-----|-----------------|-------------------|---------------|----------------|--------------------------------------------------------------------------|--------------------------------------------------------------------------------------------------------------------------------------------------------------------------------------------------------------------------------------------------------------|
| 131               | 4   | <i>TUBA1A</i>   | p.Val118Met       | LP            | De novo        | autosomal dominant lissencephaly 3 [MIM: 611603]                         | astigmatism, early tooth eruption, premature adult teeth                                                                                                                                                                                                     |
| 132               | 1   | <i>KMT2A</i>    | p.Ser3446Phefs*29 | P             | De novo        | autosomal dominant Wiedemann-Steiner syndrome [MIM: 605130]              | brain malformation, developmental delay, spasticity, hyperreflexia, wide based gait developmental delay, short stature, ptosis, hypotonia                                                                                                                    |
| <b>Homozygous</b> |     |                 |                   |               |                |                                                                          |                                                                                                                                                                                                                                                              |
| 133               | 2   | <i>SURF1</i>    | Splice Defect     | LP            | Both           | Leigh syndrome, due to COX deficiency [MIM: 256000]                      | hypotonia, lactic acidosis, failure to thrive, neurological deterioration                                                                                                                                                                                    |
| 134               | 0   | <i>NDUFS8</i>   | p.Lys115Glu       | LP            | Both           | Leigh syndrome [MIM:256000]                                              | respiratory failure, metabolic acidosis, metabolic disorder, lactic acidosis, mitochondrial disorder, pyruvate dehydrogenase complex deficiency, white matter necrosis, ventricular hypertrophy, hepatic steatosis, iliac artery thrombosis, Leigh's disease |
| 135               | 15  | <i>KCNJ13</i>   | p.Thr153Ile       | LP            | Both           | Leber congenital amaurosis [MIM: 614186]                                 | Leber congenital amaurosis, cone-rod dystrophy, cone rod dystrophy, nystagmus, night blindness, photophobia, color disturbances, atrophic changes in macular, macular atrophy                                                                                |
| 136               | 6   | <i>SLC35C1</i>  | p.Thr291Ile       | LP            | Both           | leukocyte adhesion deficiency II (LAD2) [MIM: 266265]                    | developmental delay, failure to thrive, feeding problem, feeding issue, cytochrome C oxidase, citrate synthase, complex IV, mitochondria, duplex collecting system, ectopic ureter, toe-walking, poor growth, brain atrophy                                  |
| 137               | 19  | <i>ALDH18A1</i> | p.Arg765Gln       | LP            | Both           | autosomal recessive cutis laxa, type IIIA (ARCL3A) [MIM: 219150]         | developmental delay, delayed milestones, microcephaly, seizures, hypotonia, autism, self injurious, involuntary movements, cognitive deficit, sleep disturbance, metabolic disorders                                                                         |
| 138               | 0   | <i>GLDC</i>     | p.Pro581Arg       | LP            | Both           | autosomal recessive non-ketotic hyperglycinemia [MIM: 605899]            | micrognathia, hypotonia, prominent forehead, seizures, respiratory failure, dysmorphic features, failure to thrive                                                                                                                                           |
| 139               | 1   | <i>USH2A</i>    | p.Ser3276*        | LP            | Both           | autosomal recessive Usher Syndrome type 2A [MIM: 276901]                 | Deafness, hearing loss                                                                                                                                                                                                                                       |
| 140               | 0   | <i>ALDH7A1</i>  | p.Glu427Gln       | LP            | Both           | pyridoxine-dependent epilepsy [MIM: 266100]                              | seizures, developmental delay, hydrocephalus.                                                                                                                                                                                                                |
| 141               | 26  | <i>TCAP</i>     | p.Ser11*          | LP            | Both           | autosomal recessive Limb-girdle muscular dystrophy type 2G [MIM: 601954] | muscular dystrophy, myopathy, muscle weakness                                                                                                                                                                                                                |

© 2014 American Medical Association. All rights reserved.

| Patient Index | Age | Gene Name     | Protein Change        | Variant Class | Inherited From | Disease Name                                                                                                                                                                                                                                                                                                                             | Clinical Indication*                                                                                                                                                                                                                                                                 |
|---------------|-----|---------------|-----------------------|---------------|----------------|------------------------------------------------------------------------------------------------------------------------------------------------------------------------------------------------------------------------------------------------------------------------------------------------------------------------------------------|--------------------------------------------------------------------------------------------------------------------------------------------------------------------------------------------------------------------------------------------------------------------------------------|
| 142           | 9   | <i>GJB2</i>   | p.Val37Ile            | LP            | Both           | Bart-Pumphrey syndrome [MIM: 149200]; Deafness, autosomal dominant 3A [MIM: 601544]; Deafness, autosomal recessive 1A [MIM: 220290]; Hystrix-like ichthyosis with deafness [MIM: 602540]; Keratitis-ichthyosis-deafness syndrome [MIM: 148210]; Keratoderma, palmoplantar, with deafness [MIM: 148350]; Vohwinkel syndrome [MIM: 124500] | jerks, hearing loss, seizures, dystonic head movements, enchondroma                                                                                                                                                                                                                  |
| 143           | 0   | <i>CRLF1</i>  | p.Pro239Alafs*91      | P             | Both           | autosomal recessive Crisponi syndrome (cold-induced sweating syndrome type 1) [MIM: 272430]                                                                                                                                                                                                                                              | developmental delay, camptodactyly, feeding intolerance, hydronephrosis, Schwartz-Jampel syndrome, hypertonia, dysmorphic features, micrognathia, Crisponi syndrome                                                                                                                  |
| 144           | 13  | <i>ACOX1</i>  | p.Arg59Pro            | LP            | Both           | autosomal recessive adrenoleukodystrophy due to peroxisomal acyl-CoA oxidase deficiency [MIM: 264470]                                                                                                                                                                                                                                    | developmental delay, degenerative brain, demyelination, dysmyelination, brain atrophy, corpus callosum, brainstem, cognitive dysfunction, ataxia, pyramidal tract signs, color vision, optic atrophy, astigmatism, quadriparesis, spasticity, bowel dysfunction, bladder dysfunction |
| 145           | 16  | <i>SH3TC2</i> | p.Arg954*             | P             | Both           | autosomal recessive Charcot-Marie-Tooth Disease (CMT) type 4C [MIM: 601596]                                                                                                                                                                                                                                                              | spasms, contractures, Achilles tendon release, cerebral palsy, scoliosis, muscle weakness, hyperflexible, sensory deficits, areflexia, neuropathy, demyelination, Charcot Marie Tooth, fasciculations                                                                                |
| 146           | 6   | <i>PRF1</i>   | p.Gln446Pro           | LP            | Both           | autosomal recessive familial hemophagocytic lymphohistiocytosis type 2 [MIM: 603553]                                                                                                                                                                                                                                                     | immunodeficiency, hemophagocytic lymphohistiocytosis, fever, splenomegaly, decreased NK cell activity, elevated IL-2 receptor, cytopenia                                                                                                                                             |
| 147           | 12  | <i>FA2H</i>   | p.Pro173Ser           | LP            | Both           | autosomal recessive spastic paraplegia type 35 (SPG35) [MIM: 612319]                                                                                                                                                                                                                                                                     | mitochondrial, gait disturbance, spasticity, hyperreflexia, muscle weakness, metabolic disorders, leukopathy                                                                                                                                                                         |
| 148           | 22  | <i>RPL44</i>  | p.Leu156Arg           | LP            | Both           | autosomal recessive combined oxidative phosphorylation deficiency type 16 [MIM: 615395]                                                                                                                                                                                                                                                  | cardiomyopathy, myopathy, kidney disease, mitochondrial, arrhythmia, muscle weakness                                                                                                                                                                                                 |
| 149           | 0   | <i>RRM2B</i>  | p.Gly212_Leu213insSer | LP            | Both           | autosomal recessive mitochondrial DNA depletion syndrome types 8A; 8B [MIM: 612075]                                                                                                                                                                                                                                                      | mitochondrial disorder, poor feeding, hypotonia, progressive weakness, respiratory failure, developmental delay, retinopathy, elevated lactic acid, increased Krebs cycle                                                                                                            |

© 2014 American Medical Association. All rights reserved.

| Patient Index     | Age | Gene Name     | Protein Change    | Variant Class | Inherited From | Disease Name                                                                                                                                                                                        | Clinical Indication*                                                                                                                                                                                                                                                                                                                                                       |
|-------------------|-----|---------------|-------------------|---------------|----------------|-----------------------------------------------------------------------------------------------------------------------------------------------------------------------------------------------------|----------------------------------------------------------------------------------------------------------------------------------------------------------------------------------------------------------------------------------------------------------------------------------------------------------------------------------------------------------------------------|
| 150               | 4   | <i>MTFMT</i>  | p.Pro373Glnfs*19  | LP            | Both           | autosomal recessive combined oxidative phosphorylation deficiency type 15 [MIM: 611766]                                                                                                             | developmental delay, seizures, stroke, moyamoya, failure to thrive, heart defect, pulmonic stenosis, carotid stenosis, end stage renal disease, anemia, hypertension, bone mineral disease, vesicoureteral reflux, neurovascular abnormalities, dysmorphic features, Peritonitis, Alagille syndrome                                                                        |
| 151               | 0   | <i>TRMU</i>   | p.Leu253Pro       | LP            | Both           | autosomal recessive transient infantile liver failure [MIM: 613070]                                                                                                                                 | liver failure, metabolic disorders, hyperbilirubinemia, thrombocytopenia, anemia, direct hyperbili, lactic acidosis, transaminitis, mitochondrial disorder                                                                                                                                                                                                                 |
| 152               | 4   | <i>PLA2G6</i> | p.Gly373Arg       | P             | Both           | autosomal recessive infantile neuroaxonal dystrophy 1 (neurodegeneration with brain iron accumulation types 2A; 2B) [MIM: 256600] [MIM: 610217]                                                     | autism, developmental delay, developmental regression, congenital anomalies, microcephaly, cerebral palsy, pontocerebellar hypoplasia, encephalopathy, spasticity, hypotonia, ataxia                                                                                                                                                                                       |
| <b>Hemizygous</b> |     |               |                   |               |                |                                                                                                                                                                                                     |                                                                                                                                                                                                                                                                                                                                                                            |
| 153               | 5   | <i>ATRX</i>   | p.Pro190Ala       | LP            | M              | Alpha-thalassemia myelodysplasia syndrome, somatic [MIM: 300448]; Alpha-thalassemia/mental retardation syndrome [MIM: 301040]; Mental retardation-hypotonic facies syndrome, X-linked [MIM: 309580] | hypotonia, developmental delay, craniosynostosis, microcephaly, scaphocephaly, trigonocephaly, seizures, epilepsy, dysmorphic features, camptodactyly, amblyopia, nystagmus, ptosis, entropion, myopia, astigmatism, optic nerve hypoplas*, undescended testicle*                                                                                                          |
| 154               | 41  | <i>RPGR</i>   | p.Glu1060ArgfsX18 | LP            | M              | X-linked cone-rod dystrophy [MIM: 304020]                                                                                                                                                           | cone dystrophy, stargardt                                                                                                                                                                                                                                                                                                                                                  |
| 155               | 2   | <i>KDM6A</i>  | p.Arg1279*        | LP            | M (mosaic)     | Kabuki Syndrome [MIM: 300867]                                                                                                                                                                       | developmental delay, failure to thrive, abdominal pain, seizures, breath holding spell, facial dysmorphic features, prominent eyes, long eyelashes, short nose, anteverted nares, increased lipid on muscle biopsy, hypertonia, metabolic disorder, autoimmune disorder, familial mediterranean fever, Rubinstein Taybi syndrome, pilomatricoma formation, erythromelalgia |
| 156               | 3   | <i>MED12</i>  | p.Thr617Ala       | LP            | M              | X-Linked Intellectual Disability Syndromes: Lujan-Fryns Syndrome [MIM:309520]; Opitz-Kaveggia Syndrome [MIM: 305450]                                                                                | autism, craniofacial, dysmorphic features, epicanthal folds, language, mid face hypoplasia                                                                                                                                                                                                                                                                                 |

© 2014 American Medical Association. All rights reserved.

| Patient Index                | Age | Gene Name       | Protein Change  | Variant Class | Inherited From | Disease Name                                                                                                                                                                                                  | Clinical Indication*                                                                                                                                                                |
|------------------------------|-----|-----------------|-----------------|---------------|----------------|---------------------------------------------------------------------------------------------------------------------------------------------------------------------------------------------------------------|-------------------------------------------------------------------------------------------------------------------------------------------------------------------------------------|
| 157                          | 18  | <i>IL2RG</i>    | p.Val152Ala     | P             | M              | X-linked recessive severe combined immunodeficiency [MIM: 300400]                                                                                                                                             | SCID, immunodeficiency, granulomas, skin rash, epidermodysplasia verruciformis, warts, pyoderma gangrenosum.                                                                        |
| 158                          | 0   | <i>CLCNKB</i>   | p.Leu633*       | LP            | F*             | autosomal recessive Bartter Syndrome type 3 [MIM: 607364]                                                                                                                                                     | Bartter, chloride channel, Gitelman, hypochloremic, hypokalemic, hyponatremic, lethargy                                                                                             |
| 159                          | 1   | <i>ATRX</i>     | p.Arg2131Gln    | P             | M              | X-linked recessive intellectual disability with hypotonic facies syndrome [MIM: 309580]                                                                                                                       | developmental delay, failure to thrive, hypotonia, cerebral palsy, dysmorphic features, Secundum Atrial Septal Defects, heart defect                                                |
| 160                          | 2   | <i>BRWD3</i>    | p.Leu1419Val    | LP            | M              | X-linked intellectual disability type 93 [MIM: 300659]                                                                                                                                                        | autism, developmental delay, macrocephaly, hypotonia, dysmorphism                                                                                                                   |
| 161                          | 22  | <i>G6PD</i>     | p.Ser188Phe     | P             | M              | glucose-6-phosphate deficiency in males [MIM: 305900]                                                                                                                                                         | rod-cone dystrophy, peripheral vision loss, central vision loss, retinitis pigmentosa, Glucose 6-Phosphatase deficiency                                                             |
| <b>Compound Heterozygous</b> |     |                 |                 |               |                |                                                                                                                                                                                                               |                                                                                                                                                                                     |
| 162                          | 0   | <i>RAPSN</i>    | p.Gln175Arg     | LP            | F              | autosomal recessive congenital myasthenic syndrome associated with facial dysmorphism; acetylcholine receptor deficiency [MIM: 608931]; autosomal recessive fetal akinesia deformation sequence [MIM: 208150] | myopathy, hypotonia, contractures, oropharyngeal dysphagia, intrauterine growth restriction<br>dysmorphic features, distal arthrogyriposis, areflexia, respiratory distress, EMARDD |
| 162                          | 0   | <i>RAPSN</i>    | p.Thr277Ala     | LP            | M              | autosomal recessive congenital myasthenic syndrome associated with facial dysmorphism; acetylcholine receptor deficiency [MIM: 608931]; autosomal recessive fetal akinesia deformation sequence [MIM: 208150] | myopathy, hypotonia, contractures, oropharyngeal dysphagia, intrauterine growth restriction<br>dysmorphic features, distal arthrogyriposis, areflexia, respiratory distress, EMARDD |
| 163                          | 1   | <i>SLC12A1</i>  | p.Tyr245*       | P             | M              | autosomal recessive Bartter syndrome, antenatal, type 1 [MIM: 601678]                                                                                                                                         | Bartter, hypercalcemia, hyperparathyroidism, hyponatremia, hypokalemia, Nephrogenic diabetes insipidus, medullary nephrocalcinosis, polyuria, short stature, growth failure         |
| 163                          | 1   | <i>SLC12A1</i>  | p.Ala508Thr     | P             | F              | autosomal recessive Bartter syndrome, antenatal, type 1 [MIM: 601678]                                                                                                                                         | Bartter, hypercalcemia, hyperparathyroidism, hyponatremia, hypokalemia, Nephrogenic diabetes insipidus, medullary nephrocalcinosis, polyuria, short stature, growth failure         |
| 164                          | 15  | <i>B3GALNT2</i> | p.Glu480_Trp485 | LP            | F              | autosomal recessive congenital                                                                                                                                                                                | muscular dystrophy, autism, developmental                                                                                                                                           |

© 2014 American Medical Association. All rights reserved.

| Patient Index | Age | Gene Name | Protein Change | Variant Class | Inherited From | Disease Name                                                                                                            | Clinical Indication*                                                                                                                                                                                                                                                                                             |
|---------------|-----|-----------|----------------|---------------|----------------|-------------------------------------------------------------------------------------------------------------------------|------------------------------------------------------------------------------------------------------------------------------------------------------------------------------------------------------------------------------------------------------------------------------------------------------------------|
|               |     |           | dup            |               |                | muscular dystrophy-dystroglycanopathy with brain; eye anomalies type A, 11 [MIM: 615181]                                | delay, hypotonia, polymicrogyria, cerebellar cortical cysts                                                                                                                                                                                                                                                      |
| 164           | 15  | B3GALNT2  | p.Asp327Asn    | LP            | M              | autosomal recessive congenital muscular dystrophy-dystroglycanopathy with brain; eye anomalies type A, 11 [MIM: 615181] | muscular dystrophy, autism, developmental delay, hypotonia, polymicrogyria, cerebellar cortical cysts                                                                                                                                                                                                            |
| 165           | 3   | TBC1D24   | p.Trp406Cys    | LP            | F              | familial or infantile myoclonic epilepsy [MIM: 613577]                                                                  | developmental delay, epilepsy, seizures, hypoplastic corpus callosum, lysosomal storage disorder, neuronal ceroid lipofuscinosis disorder, paroxysmal disorder, Angelman, Rett syndrome, spasticity, zellweger, adrenoleukodystrophy, Krabbe's disease, Niemann Pick Type A, Glutaric Aciduria Type 1, Tay Sachs |
| 165           | 3   | TBC1D24   | p.Cys424Arg    | LP            | M              | familial or infantile myoclonic epilepsy [MIM: 613577]                                                                  | developmental delay, epilepsy, seizures, hypoplastic corpus callosum, lysosomal storage disorder, neuronal ceroid lipofuscinosis disorder, paroxysmal disorder, Angelman, Rett syndrome, spasticity, zellweger, adrenoleukodystrophy, Krabbe's disease, Niemann Pick Type A, Glutaric Aciduria Type 1, Tay Sachs |
| 166           | 8   | CLN8      | p.Leu188Valfs  | P             | F              | neuronal ceroid lipofuscinosis (NCL) [MIM:600143]                                                                       | retinitis pigmentosa, cone rod dystrophy, vision loss, neuronal ceroid lipofuscinosis, seizures, hyperactivity, attention deficit, inattention, behavioral difficulties, disruptive behavior, ADHD, refsum disease, ciliopathy                                                                                   |
| 166           | 8   | CLN8      | p.Ala71Val     | LP            | M              | neuronal ceroid lipofuscinosis (NCL) [MIM:600143]                                                                       | retinitis pigmentosa, cone rod dystrophy, vision loss, neuronal ceroid lipofuscinosis, seizures, hyperactivity, attention deficit, inattention, behavioral difficulties, disruptive behavior, ADHD, refsum disease, ciliopathy                                                                                   |
| 167           | 31  | CNGB3     | p.Arg403Gln    | P             | F              | autosomal recessive juvenile onset macular dystrophy (Stargardt Disease) [MIM: 248200]                                  | retinitis pigmentosa, peripheral vision, panretinal abnormalities, bull's eye, maculopathy, peripapillary sparing                                                                                                                                                                                                |
| 167           | 31  | CNGB3     | p.Tyr398Cys    | LP            | M              | autosomal recessive juvenile onset macular dystrophy (Stargardt Disease) [MIM: 248200]                                  | retinitis pigmentosa, peripheral vision, panretinal abnormalities, bull's eye, maculopathy, peripapillary sparing                                                                                                                                                                                                |
| 168           | 3   | POLR3B    | p.Val523Glu    | LP            | F              | autosomal recessive                                                                                                     | deafness, hearing loss, neonatal teeth, teeth                                                                                                                                                                                                                                                                    |

© 2014 American Medical Association. All rights reserved.

| Patient Index | Age | Gene Name     | Protein Change | Variant Class | Inherited From | Disease Name                                                                                                                 | Clinical Indication*                                                                                                                                                                                                                                                                                                                               |
|---------------|-----|---------------|----------------|---------------|----------------|------------------------------------------------------------------------------------------------------------------------------|----------------------------------------------------------------------------------------------------------------------------------------------------------------------------------------------------------------------------------------------------------------------------------------------------------------------------------------------------|
| 168           | 3   | <i>POLR3B</i> | p.Thr663Ile    | LP            | M              | hypomyelinating leukodystrophy type 8 [MIM:614381]<br>autosomal recessive hypomyelinating leukodystrophy type 8 [MIM:614381] | eruption , dental eruption , weight gain, short stature, ectodermal dysplasia, Pendred syndrome, Mondini malformation, ataxia deafness, hearing loss, neonatal teeth, teeth eruption , dental eruption , weight gain, short stature, ectodermal dysplasia, Pendred syndrome, Mondini malformation, ataxia                                          |
| 169           | 25  | <i>CERKL</i>  | p.Arg257*      | P             | F              | autosomal recessive retinitis pigmentosa type 26 (RP26) [MIM:608380]                                                         | night blindness, central vision, bull's eye, peripheral vision, color disturbance, light adaptation, dark adaptation, retinitis pigmentosa                                                                                                                                                                                                         |
| 169           | 25  | <i>CERKL</i>  | p.Asp225Val    | LP            | M              | autosomal recessive retinitis pigmentosa type 26 (RP26) [MIM:608380]                                                         | night blindness, central vision, bull's eye, peripheral vision, color disturbance, light adaptation, dark adaptation, retinitis pigmentosa                                                                                                                                                                                                         |
| 170           | 2   | <i>GOSR2</i>  | p.Gly144Trp    | P             | F              | autosomal recessive progressive myoclonic epilepsy, type 6 [MIM:614018]                                                      | hypotonia, muscular dystrophy, chronic transaminitis, cyanosis , developmental delay, Scoliosis, lack of white matter , thin corpus callosum, rotatory nystagmus, fine hair, cartilage tear syndrome, metaphysic, earlobes, right undescended testicle, Walker-Warburg syndrome                                                                    |
| 170           | 2   | <i>GOSR2</i>  | Splice defect  | LP            | M              | autosomal recessive progressive myoclonic epilepsy, type 6 [MIM:614018]                                                      | hypotonia, muscular dystrophy, chronic transaminitis, cyanosis , developmental delay, Scoliosis, lack of white matter , thin corpus callosum, rotatory nystagmus, fine hair, cartilage tear syndrome, metaphysic, earlobes, right undescended testicle, Walker-Warburg syndrome                                                                    |
| 171           | 3   | <i>GLB1</i>   | p.Thr82Met     | P             | F              | GM1-Gangliosidosis type 1 [MIM:230500]                                                                                       | developmental delay, hypotonia, hypotonia, speak OR speech, bilateral hip dysplasia, waddling gait, esotropia, snore, myopathy, Obstructive Sleep Apnea, cerebellar volume loss, small cerebellum, cerebellar atrophy, cerebellar hypoplasia, white matter, abnormal brain MRI, mitochondrial, very long chain fatty acids, glycosylation disorder |
| 171           | 3   | <i>GLB1</i>   | p.Gly123Arg    | P             | M              | GM1-Gangliosidosis type 1 [MIM:230500]                                                                                       | developmental delay, hypotonia, bilateral hip dysplasia, waddling gait, esotropia, myopathy, Obstructive Sleep Apnea, cerebellar atrophy, cerebellar hypoplasia, white matter, abnormal                                                                                                                                                            |

© 2014 American Medical Association. All rights reserved.



| Patient Index | Age | Gene Name | Protein Change    | Variant Class | Inherited From | Disease Name                                                                                   | Clinical Indication*                                                                                                                                                                                                                        |
|---------------|-----|-----------|-------------------|---------------|----------------|------------------------------------------------------------------------------------------------|---------------------------------------------------------------------------------------------------------------------------------------------------------------------------------------------------------------------------------------------|
| 172           | 1   | IMGHMBP2  | p.Trp31*          | LP            | M              | autosomal recessive distal spinomuscular atrophy type 1 (SMARD1) [MIM:604320]                  | brain MRI, mitochondrial, very long chain fatty acids, glycosylation disorder<br>spinal muscular atrophy with respiratory distress                                                                                                          |
| 172           | 1   | IMGHMBP2  | p.Lys220Asn       | LP            | F              | autosomal recessive distal spinomuscular atrophy type 1 (SMARD1) [MIM:604320]                  | spinal muscular atrophy with respiratory distress                                                                                                                                                                                           |
| 173           | 6   | DHTKD1    | p.Arg715Cys       | LP            | F              | autosomal recessive 2-aminoadipic 2-oxoadipic aciduria [MIM:204750]                            | 2-ketoadipic, alpha-aminoadipic aciduria, dizziness, Esotropia, failure to thrive, headache, head-tilting, lysine metabolism, microcephaly, migraine, nausea, pansinusitis, patent ductus arteriosus, Still's murmur, tryptophan metabolism |
| 173           | 6   | DHTKD1    | p.Gly729Arg       | LP            | M              | autosomal recessive 2-aminoadipic 2-oxoadipic aciduria [MIM:204750]                            | 2-ketoadipic, alpha-aminoadipic aciduria, dizziness, Esotropia, failure to thrive, headache, head-tilting, lysine metabolism, microcephaly, migraine, nausea, pansinusitis, patent ductus arteriosus, Still's murmur, tryptophan metabolism |
| 174           | 60  | MEFV      | p.Ala744Ser       | LP            | M              | autosomal recessive familial Mediterranean fever [MIM: 249100]                                 | Stroke, neurocognitive, neurodegenerative, mitochondrial, encephalopathy, aphasia, weakness, muscle jerks, hallucinations, tremors.                                                                                                         |
| 174           | 60  | MEFV      | p.Lys695Arg       | LP            | F              | autosomal recessive familial Mediterranean fever [MIM: 249100]                                 | Stroke, neurocognitive, neurodegenerative, mitochondrial, encephalopathy, aphasia, weakness, muscle jerks, hallucinations, tremors.                                                                                                         |
| 175           | 0   | NPC1      | p.Pro1080IlefsX18 | LP            | F              | autosomal recessive Niemann-Pick disease type C1 (NPC1) [MIM: 257220]                          | liver failure, hepatitis                                                                                                                                                                                                                    |
| 175           | 0   | NPC1      | p.Ser738*         | LP            | M              | autosomal recessive Niemann-Pick disease type C1 (NPC1) [MIM: 257220]                          | liver failure, hepatitis                                                                                                                                                                                                                    |
| 176           | 34  | SETX      | p.Gly2036Arg      | LP            | M              | Amyotrophic lateral sclerosis 4, juvenile [MIM: 602433]; Ataxia-ocular apraxia-2 [MIM: 606002] | ataxia, neuropathy                                                                                                                                                                                                                          |
| 176           | 34  | SETX      | Splice defect     | LP            | F              | Amyotrophic lateral sclerosis 4, juvenile [MIM: 602433]; Ataxia-ocular apraxia-2 [MIM: 606002] | ataxia, neuropathy                                                                                                                                                                                                                          |

| Patient Index | Age | Gene Name      | Protein Change     | Variant Class | Inherited From | Disease Name                                                                                                                   | Clinical Indication*                                                                                                                                                 |
|---------------|-----|----------------|--------------------|---------------|----------------|--------------------------------------------------------------------------------------------------------------------------------|----------------------------------------------------------------------------------------------------------------------------------------------------------------------|
| 177           | 2   | <i>SLC45A2</i> | p.Gly89Aspfs*24    | LP            | F              | oculocutaneous albinism type IV [MIM: 606574]                                                                                  | omphalocele, small VSD , AV heart block, developmental delay, cerebellar vermis hypoplasia, oculocutaneous albinism, myopia, optic nerve hypoplasia, ocular albinism |
| 177           | 2   | <i>SLC45A2</i> | p.Leu485Pro        | LP            | M              | oculocutaneous albinism type IV [MIM: 606574]                                                                                  | omphalocele, small VSD , AV heart block, developmental delay, cerebellar vermis hypoplasia, oculocutaneous albinism, myopia, optic nerve hypoplasia, ocular albinism |
| 178           | 0   | <i>ACAD9</i>   | p.Pro616Ser        | LP            | F              | autosomal recessive acyl-CoA dehydrogenase-9 deficiency [MIM: 611126]                                                          | lactic acidosis, metabolic acidosis, encephalopathy, developmental delay, emesis                                                                                     |
| 178           | 0   | <i>ACAD9</i>   | p.Phe120Serfs*9    | LP            | M              | autosomal recessive acyl-CoA dehydrogenase-9 deficiency [MIM: 611126]                                                          | lactic acidosis, metabolic acidosis, encephalopathy, developmental delay, emesis                                                                                     |
| 179           | 1   | <i>FADD</i>    | p.Ser18*           | LP            | M              | autosomal recessive recurrent infections with encephalopathy, hepatic dysfunction; cardiovascular malformations [MIM: 613759]  | seizures, stroke, ataxia, hepatomegaly, skin rash, Alpers syndrome, Mitochondrial encephalomyopathy, lactic acidosis, stroke-like episodes, MELAS                    |
| 179           | 1   | <i>FADD</i>    | p.Cys105Arg        | LP            | F              | autosomal recessive recurrent infections with encephalopathy, hepatic dysfunction,; cardiovascular malformations [MIM: 613759] | seizures, stroke, ataxia, hepatomegaly, skin rash, Alpers syndrome, Mitochondrial encephalomyopathy, lactic acidosis, stroke-like episodes, MELAS                    |
| 180           | 23  | <i>TTN</i>     | p.Arg32684Thrfs*47 | LP            | M              | autosomal recessive early-onset myopathy [MIM: 611705]; limb-girdle muscular dystrophy type 2] [MIM: 608807]                   | muscular dystrophy, muscle weakness, rhabdomyolysis, calf pain, myopathy, fatigue                                                                                    |
| 180           | 23  | <i>TTN</i>     | p.Arg33084*        | LP            | F              | autosomal recessive early-onset myopathy [MIM: 611705]; limb-girdle muscular dystrophy type 2] [MIM: 608807]                   | muscular dystrophy, muscle weakness, rhabdomyolysis, calf pain, myopathy, fatigue                                                                                    |
| 181           | 1   | <i>LIPT1</i>   | p.Trp269*          | P             | F              | autosomal recessive lipoylation defect of the 2-ketoacid dehydrogenase complexes                                               | lactic acidosis, metabolic acidosis, respiratory distress, mitochondrial                                                                                             |
| 181           | 1   | <i>LIPT1</i>   | p.Leu327*          | P             | M              | autosomal recessive lipoylation defect of the 2-ketoacid dehydrogenase complexes                                               | lactic acidosis, metabolic acidosis, respiratory distress, mitochondrial                                                                                             |
| 182           | 4   | <i>AHI1</i>    | p.Cys854Phe        | LP            | M              | autosomal recessive Joubert's syndrome type 3 [MIM: 608629]                                                                    | developmental delay, spasticity, seizures, hypertonia, Gastroesophageal reflux disease, Chiari malformation, dental caries                                           |

© 2014 American Medical Association. All rights reserved.

| Patient Index | Age | Gene Name     | Protein Change   | Variant Class | Inherited From | Disease Name                                                                                  | Clinical Indication*                                                                                                                                                                                                                                                                             |
|---------------|-----|---------------|------------------|---------------|----------------|-----------------------------------------------------------------------------------------------|--------------------------------------------------------------------------------------------------------------------------------------------------------------------------------------------------------------------------------------------------------------------------------------------------|
| 182           | 4   | <i>AHI1</i>   | p.Ser1123Phe     | LP            | F              | autosomal recessive Joubert's syndrome type 3 [MIM: 608629]                                   | developmental delay, spasticity, seizures, hypertonia, Gastroesophageal reflux disease, Chiari malformation, dental caries                                                                                                                                                                       |
| 183           | 6   | <i>MUT</i>    | p.Arg108Cys      | P             | M              | autosomal recessive methylmalonic aciduria [MIM: 251000]                                      | liver failure, methylmalonic aciduria, cryptogenic cirrhosis, failure to thrive, Renal insufficiency, Wilson's Disease                                                                                                                                                                           |
| 183           | 6   | <i>MUT</i>    | p.Ala631Glnfs*17 | P             | F              | autosomal recessive methylmalonic aciduria [MIM: 251000]                                      | liver failure, methylmalonic aciduria, cryptogenic cirrhosis, failure to thrive, Renal insufficiency, Wilson's Disease                                                                                                                                                                           |
| 184           | 8   | <i>TSFM</i>   | p.Val119Leu      | LP            | F              | autosomal recessive combined oxidative phosphorylation deficiency type 3 (COPD3) [MIM: 61050] | cardiomyopathy, cytochrome oxidase deficiency                                                                                                                                                                                                                                                    |
| 184           | 8   | <i>TSFM</i>   | p.Arg333Trp      | P             | M              | autosomal recessive combined oxidative phosphorylation deficiency type 3 (COPD3) [MIM: 61050] | cardiomyopathy, cytochrome oxidase deficiency                                                                                                                                                                                                                                                    |
| 185           | 0   | <i>LAMA2</i>  | p.Glu175*        | P             | F              | autosomal recessive merosin-deficient muscular dystrophy [MIM: 607855]                        | pontocerebellar hypoplasia, dysmorphic features, hypotonia, myotonic dystrophy, muscular dystrophy, muscle atrophy, developmental delay,                                                                                                                                                         |
| 185           | 0   | <i>LAMA2</i>  | p.Arg683Serfs*21 | P             | M              | autosomal recessive merosin-deficient muscular dystrophy [MIM: 607855]                        | pontocerebellar hypoplasia, dysmorphic features, hypotonia, myotonic dystrophy, muscular dystrophy, muscle atrophy, developmental delay,                                                                                                                                                         |
| 186           | 26  | <i>ETFDH</i>  | p.Leu496Pro      | LP            | M              | autosomal recessive glutaric acidemia IIC [MIM: 231680]                                       | metabolic disorder, inborn error of metabolism, rhabdomyolysis, lactic acidosis, hypoglycemia, liver failure, muscle weakness, seizures, epilepsy, elevated liver enzymes, Carnitine palmitoyltransferase II, Carnitine-acylcarnitine translocase, Pompe disease, acute metabolic decompensation |
| 186           | 26  | <i>ETFDH</i>  | p.Pro456Leu      | P             | F              | autosomal recessive glutaric acidemia IIC [MIM: 231680]                                       | metabolic disorder, inborn error of metabolism, rhabdomyolysis, lactic acidosis, hypoglycemia, liver failure, muscle weakness, seizures, epilepsy, elevated liver enzymes, Carnitine palmitoyltransferase II, Carnitine-acylcarnitine translocase, Pompe disease, acute metabolic decompensation |
| 187           | 45  | <i>POLR3A</i> | p.Lys123del      | LP            | F              | autosomal recessive hypomyelinating leukodystrophy-7 [MIM: 607694]                            | Dementia, Tremor, Parkinsonism, Leukodystrophy                                                                                                                                                                                                                                                   |
| 187           | 45  | <i>POLR3A</i> | p.Met852Val      | LP            | M              | autosomal recessive                                                                           | Dementia, Tremor, Parkinsonism,                                                                                                                                                                                                                                                                  |

© 2014 American Medical Association. All rights reserved.

| Patient Index                 | Age | Gene Name | Protein Change | Variant Class | Inherited From | Disease Name                                                                                                                                                                                    | Clinical Indication*                                                                                                                                               |
|-------------------------------|-----|-----------|----------------|---------------|----------------|-------------------------------------------------------------------------------------------------------------------------------------------------------------------------------------------------|--------------------------------------------------------------------------------------------------------------------------------------------------------------------|
|                               |     |           |                |               |                | hypomyelinating leukodystrophy-7 [MIM: 607694]                                                                                                                                                  | Leukodystrophy                                                                                                                                                     |
| <b>Inherited Heterozygous</b> |     |           |                |               |                |                                                                                                                                                                                                 |                                                                                                                                                                    |
| 188                           | 16  | LDB3      | p.Arg268Cys    | LP            | M              | autosomal dominant myofibrillar myopathy type 4 [MIM: 609452]; autosomal dominant dilated cardiomyopathy type 1C with or without noncompaction of the left ventricular myocardium [MIM: 601493] | ataxia, neuropathy, Charcot Marie Tooth                                                                                                                            |
| 189                           | 21  | COL3A1    | p.Gln1366*     | LP            | F              | autosomal dominant Ehlers-Danlos syndrome type IV [MIM: 130050]; autosomal dominant Ehlers-Danlos syndrome type III [MIM: 130020]                                                               | Ehlers-Danlos, Loeys-Dietz, aortic dissection, hypertrophic heart, connective tissue disease                                                                       |
| 190                           | 12  | OPA1      | p.Arg711*      | LP            | F              | autosomal dominant optic atrophy type 1 (OPA1) [MIM: 165500]                                                                                                                                    | cone-rod dystrophy, achromatopsia, differentiate colors, color vision, visual acuity                                                                               |
| 191                           | 14  | TNNI3     | p.Arg170Gly    | LP            | F              | dilated cardiomyopathy type 1FF [MIM: 613286]; type 2A [MIM: 611880]; familial hypertrophic cardiomyopathy type 7 [MIM: 613690]; familial restrictive cardiomyopathy [MIM: 115210]              | atrial enlargement, diastolic dysfunction, cardiomyopathy, intestinal malrotation                                                                                  |
| 192                           | 0   | COL1A2    | p.Pro986Leu    | LP            | M              | autosomal dominant osteogenesis imperfecta type II [MIM:166210], type III [MIM: 259420]; type IV [MIM:166220]                                                                                   | bone fractures, osteogenesis imperfecta, osteopenia, Rickets, skeletal dysplasia, vitamin D deficiency                                                             |
| <b>&gt;2 LP/P reported</b>    |     |           |                |               |                |                                                                                                                                                                                                 |                                                                                                                                                                    |
| 193                           | 19  | STAT1     | p.Arg274Trp    | P             | De novo        | chronic mucocutaneous candidiasis-7 (CANDF7) [MIM: 600555]                                                                                                                                      | immunodeficiency, chronic infections, growth failure, hemolytic anemia, hypersplenism, splenomegaly, delayed skeletal maturation, IGF-1 deficiency                 |
| 193                           | 19  | G6PD      | p.Ser188Phe    | P             | M              | chronic non-spherocytic hemolytic anemia (CNSHA) [MIM: 305900]                                                                                                                                  | immunodeficiency, chronic infections, growth failure, hemolytic anemia, hypersplenism, splenomegaly, delayed skeletal maturation, IGF-1 deficiency                 |
| 194                           | 5   | DYNC1H1   | p.Arg1567Leu   | LP            | De novo        | autosomal dominant axonal Charot-Marie-Tooth disease type 20 [MIM:614228]; autosomal dominant intellectual disability type 13                                                                   | congenital anomalies, developmental delay, dysmorphic features, dysmorphic features, epilepsy, hearing loss, lissencephaly, pachygyria, seizures, ventriculomegaly |

© 2014 American Medical Association. All rights reserved.

| Patient Index                | Age | Gene Name        | Protein Change   | Variant Class | Inherited From | Disease Name                                                                                                                | Clinical Indication*                                                                                                                                                                         |
|------------------------------|-----|------------------|------------------|---------------|----------------|-----------------------------------------------------------------------------------------------------------------------------|----------------------------------------------------------------------------------------------------------------------------------------------------------------------------------------------|
| 194                          | 5   | <i>OTOF</i>      | p.Lys1310dup     | LP            | M              | [MIM:614563]<br>autosomal recessive auditory neuropathy; deafness [MIM:601071]                                              | congenital anomalies, developmental delay, dysmorphic features, dysmorphic features, epilepsy, hearing loss, lissencephaly, pachygyria, seizures, ventriculomegaly                           |
| 194                          | 5   | <i>OTOF</i>      | p.Glu1700Gln     | LP            | F              | autosomal recessive auditory neuropathy; deafness [MIM:601071]                                                              | congenital anomalies, developmental delay, dysmorphic features, dysmorphic features, epilepsy, hearing loss, lissencephaly, pachygyria, seizures, ventriculomegaly                           |
| 194                          | 5   | <i>F8</i>        | p.Glu1057Lys     | LP            | M              | X-linked hemophilia A [MIM:306700]                                                                                          | congenital anomalies, developmental delay, dysmorphic features, dysmorphic features, epilepsy, hearing loss, lissencephaly, pachygyria, seizures, ventriculomegaly                           |
| 195                          | 5   | <i>F9</i>        | p.Ala279Thr      | P             | M              | X-linked recessive hemophilia B [MIM: 306900]                                                                               | immunodeficiency, hypogammaglobulinemia, hemophilia, factor IX deficiency, iron deficiency anemia, bleeding disorder                                                                         |
| 195                          | 5   | <i>TNFRSF13B</i> | p.Cys104Arg      | LP            | M              | common variable immunodeficiency type 2 [MIM: 240500]                                                                       | immunodeficiency, hypogammaglobulinemia, hemophilia, factor IX deficiency, iron deficiency anemia, bleeding disorder                                                                         |
| <b>Other-CES</b>             |     |                  |                  |               |                |                                                                                                                             |                                                                                                                                                                                              |
| <b>Homozygous</b>            |     |                  |                  |               |                |                                                                                                                             |                                                                                                                                                                                              |
| 196                          | 16  | <i>PDE6C</i>     | p.Leu653Pro      | LP            | ?/M            | achromatopsia; cone dystrophy type 4 (COD4) [MIM: 613093]                                                                   | cone dystrophy, cone-rod dystrophy, achromatopsia, color vision, photophobia, peripheral vision, central vision, nystagmus, CLCA                                                             |
| 197                          | 50  | <i>RLBP1</i>     | p.Phe96_Phe99del | LP            | ?/M            | autosomal recessive Bothnia retinal dystrophy [MIM: 607475]; autosomal recessive Retinitis punctata albescens [MIM: 136880] | Retinal Dystrophy, Stargardt, Retinitis Punctata Albescens, Renal Disease, renal dysplasia, MELAS syndrome, Cystinuria, Cysteinuria, Proteinuria, Alport, Focal segmental glomerulosclerosis |
| 198                          | 25  | <i>MERTK</i>     | p.Leu731Ser      | LP            | ?/M            | autosomal recessive retinitis pigmentosa type 38 [MIM: 613862]                                                              | Cone-rod dystrophy, retinopathy, stargardt                                                                                                                                                   |
| <b>Compound Heterozygous</b> |     |                  |                  |               |                |                                                                                                                             |                                                                                                                                                                                              |
| 199                          | 15  | <i>RTEL1</i>     | p.Ile449Thr      | LP            | Not from M     | autosomal recessive dyskeratosis congenita type 5 [MIM:615190]                                                              | dyskeratosis congenita, T-cell deficiency, immunodeficiency                                                                                                                                  |
| 199                          | 15  | <i>RTEL1</i>     | p.Arg1010*       | LP            | M              | autosomal recessive dyskeratosis congenita type 5 [MIM:615190]                                                              | dyskeratosis congenita, T-cell deficiency, immunodeficiency                                                                                                                                  |
| 200                          | 58  | <i>CNGA1</i>     | p.Arg218*        | P             | Not from M     | autosomal recessive Retinitis Pigmentosa 49 (RP49) [MIM: 613756]                                                            | retinitis pigmentosa, hypothyroidism, hypogonadism, hypoalbuminemia, gout                                                                                                                    |

© 2014 American Medical Association. All rights reserved.

| Patient Index                                                                  | Age | Gene Name | Protein Change  | Variant Class | Inherited From | Disease Name                                                                                                       | Clinical Indication*                                                                                                                                                                                                                                                                                                                                            |
|--------------------------------------------------------------------------------|-----|-----------|-----------------|---------------|----------------|--------------------------------------------------------------------------------------------------------------------|-----------------------------------------------------------------------------------------------------------------------------------------------------------------------------------------------------------------------------------------------------------------------------------------------------------------------------------------------------------------|
| 200                                                                            | 58  | CNGA1     | p.Ser320Phe     | P             | M              | autosomal recessive Retinitis Pigmentosa 49 (RP49) [MIM: 613756]                                                   | Atrial fibrillation, colonic diverticulosis, hypertension, sleep apnea, obesity, vitamin D deficiency<br>alpha 1-antitrypsin deficiency<br>retinitis pigmentosa, hypothyroidism, hypogonadism, hypoalbuminemia, gout<br>Atrial fibrillation, colonic diverticulosis, hypertension, sleep apnea, obesity, vitamin D deficiency<br>alpha 1-antitrypsin deficiency |
| <b>Heterozygous not inherited from the parent sequenced (could be de novo)</b> |     |           |                 |               |                |                                                                                                                    |                                                                                                                                                                                                                                                                                                                                                                 |
| 201                                                                            | 19  | NF1       | p.Arg2616*      | LP            | Not from M     | autosomal dominant neurofibromatosis type 1 (NF1) [MIM: 162200]                                                    | neurofibromatosis                                                                                                                                                                                                                                                                                                                                               |
| 202                                                                            | 3   | SUFU      | p.Tyr38Thrfs*58 | P             | Not from M     | autosomal dominant desmoplastic medulloblastoma [MIM: 155255]; susceptibility to familial meningioma [MIM: 607174] | cancer susceptibility, medulloblastoma, dysmorphic features, macrocephaly, hypertelorism, microtia, clinodactyly                                                                                                                                                                                                                                                |
| 203                                                                            | 9   | GNAS      | p.Gln294*       | LP            | Not from M     | autosomal dominant pseudohypoparathyroidism types Ia (PHP Ia) [MIM: 103580]; Ic (PHP Ic) [MIM: 612462]             | developmental delay, short stature, amblyopia, spina bifida occulta, seizures, epilepsy, advanced bone age, shortened metacarpals, vesicoureteral reflux, dysmorphic features, microcephaly                                                                                                                                                                     |
| 204                                                                            | 1   | PIK3R1    | p.Arg649Trp     | P             | Not from M     | autosomal dominant SHORT syndrome [MIM: 269880]                                                                    | growth retardation, developmental delay, microcephaly, dysmorphic features, small corpus callosum, SHORT syndrome, joint hypermobility                                                                                                                                                                                                                          |
| 205                                                                            | 9   | NR5A1     | p.Glu51*        | P             | Not from M     | autosomal dominant sex-limited 46,XY sex reversal 3 [MIM:612965]                                                   | sexual development, ambiguous genitalia, androgen insensitivity, 5-alpha-reductase deficiency, learning disabilities                                                                                                                                                                                                                                            |
| <b>Inherited Heterozygous</b>                                                  |     |           |                 |               |                |                                                                                                                    |                                                                                                                                                                                                                                                                                                                                                                 |
| 206                                                                            | 18  | NR2E3     | p.Gly56Arg      | LP            | F              | autosomal dominant retinitis pigmentosa (type 37) [MIM: 611131]; enhanced S-cone syndrome [MIM: 268100]            | retinitis pigmentosa, nyctalopia, vascular attenuation, intraretinal pigmentation, Retinal pigment epithelium, deafness, hearing loss, usher syndrome                                                                                                                                                                                                           |
| 207                                                                            | 8   | NSD1      | Splice defect   | LP            | M              | autosomal dominant Sotos Syndrome [MIM: 117550]                                                                    | autism, developmental delay, macrocephaly, dysmorphic features, hydronephrosis, umbilical hernia, hyperbilirubinemia, atrial septal defect, exotropia, otitis media, retinopathy, Sotos syndrome                                                                                                                                                                |

© 2014 American Medical Association. All rights reserved.

\*‘Clinical indication’ indicates keywords, clinical descriptors, and potential diagnoses suggested by the referring physician for a given patient.

**eTable 3. List of copy number variants (CNVs) and uniparental disomy (UPD) reported and confirmatory status.**

| Patient Index‡ | Test Option | Age | Gene Name      | DNA Change                                                     | Disease Name                                                             | Clinical Indication*                                                                                                | Comment                                |
|----------------|-------------|-----|----------------|----------------------------------------------------------------|--------------------------------------------------------------------------|---------------------------------------------------------------------------------------------------------------------|----------------------------------------|
| 34             | proband     | 20  | <i>ASS1</i>    | Heterozygous deletion of exons 1 and 2                         | autosomal recessive citrullinemia [MIM: 215700]                          | Citrullinemia, developmental delay, seizures, spasticity, tremor, ataxia                                            | Pending confirmation at an outside lab |
| 208            | proband     | 6   | <i>DMD</i>     | Duplication of exons 3-20                                      | Duchenne Muscular Dystrophy [MIM: 310200]                                | muscular dystrophy                                                                                                  | Confirmed by Microarray                |
| 209            | proband     | 24  | <i>HSD17B3</i> | Homozygous deletion of exon 1                                  | recessive pseudohermaphroditism with gynecomastia in males [MIM: 264300] | Disorders of Sex Development (DSD)                                                                                  | Confirmed at an outside lab            |
| 210            | trio        | 0   | 47 XXY         | 47 XXY                                                         | Klinefelter syndrome                                                     | developmental delay, hypotonia, hearing loss, frontal bossing                                                       | Confirmed by microarray                |
| 211            | trio        | 17  | <i>SH2D1A</i>  | Hemizygous deletion of exon 2                                  | X-linked recessive lymphoproliferative syndrome type 1 [MIM: 308240]     | cancer susceptibility, immunodeficiency, Burkitt lymphoma                                                           | Confirmed at an outside lab            |
| 212            | proband     | 17  | 15q11.2-q13    | a region of homozygosity >5Mb that overlapped with 15q11.2-q13 | Prader-Willi Syndrome [MIM: 176270]; Angelman Syndrome [MIM: 105830]     | developmental delay, muscular dystrophy, myopathy, mitochondrial, hypotonia, dysphagia, scoliosis, heat intolerance | Confirmed at an outside lab            |
| 213            | trio        | 2   | <i>SMN1</i>    | Hemizygous deletion of exon 7                                  | autosomal recessive spinal muscular atrophy [MIM: 253300]                | motor delay, hypotonia, muscle weakness, Spinal muscular atrophy                                                    | Confirmed at an outside lab            |



| Patient Index‡ | Test Option | Age | Gene Name   | DNA Change                    | Disease Name                                                                                                                                                                                                                                                                                                                                                                                                                                                                                       | Clinical Indication*                                                                                                                                                                                                                                                | Comment                         |
|----------------|-------------|-----|-------------|-------------------------------|----------------------------------------------------------------------------------------------------------------------------------------------------------------------------------------------------------------------------------------------------------------------------------------------------------------------------------------------------------------------------------------------------------------------------------------------------------------------------------------------------|---------------------------------------------------------------------------------------------------------------------------------------------------------------------------------------------------------------------------------------------------------------------|---------------------------------|
| 214†           | proband     | 52  | <i>PTEN</i> | Homozygous deletion of exon 4 | Bannayan-Riley-Ruvalcaba syndrome [MIM: 153480]; Cowden syndrome 1 [MIM: 158350]; Endometrial carcinoma, somatic [MIM: 608089]; Lhermitte-Duclos syndrome [MIM: 158350]; Macrocephaly/autism syndrome [MIM: 605309]; Malignant melanoma, somatic [MIM: 155600]; PTEN hamartoma tumor syndrome [MIM: ]; Squamous cell carcinoma, head and neck, somatic [MIM: 275355]; Thyroid carcinoma, follicular, somatic [MIM: 188470]; VATER association with macrocephaly and ventriculomegaly [MIM: 276950] | joint hypermobility, mitral valve prolapse, mitral valve regurgitation, liver cysts, ovarian cysts, Ehlers-Danlos syndrome, connective tissue disorder, bleeding disorder, vascular abnormalities, Dysphagia, gastric polyps, lipoma, bruise, cancer susceptibility | Not confirmed at an outside lab |

‡ Continued from eTable2

† Not included in the conclusive diagnosis group

\*‘Clinical indication’ indicates keywords, clinical descriptors, and potential diagnoses suggested by the referring physician for a given patient.

**eTable 4. Demographic summary of 814 cases.**

|             | Total           |                   | <5 years        |                   | 5-18 years      |                   | >18 years       |                   |
|-------------|-----------------|-------------------|-----------------|-------------------|-----------------|-------------------|-----------------|-------------------|
|             | Male<br>(n=453) | Female<br>(n=361) | Male<br>(n=144) | Female<br>(n=110) | Male<br>(n=166) | Female<br>(n=100) | Male<br>(n=143) | Female<br>(n=151) |
| Proband-CES | 177 (40%)       | 161 (45%)         | 25 (18%)        | 25 (23%)          | 44 (27%)        | 29 (29%)          | 108 (76%)       | 107 (71%)         |
| Trio-CES    | 238 (53%)       | 172 (48%)         | 114 (77%)       | 76 (68%)          | 99 (57%)        | 64 (64%)          | 25 (18%)        | 32 (22%)          |
| Other-CES   | 38 (9%)         | 28 (8%)           | 5 (4%)          | 9 (9%)            | 23 (14%)        | 7 (7%)            | 10 (7%)         | 12 (8%)           |

eTable 5. Molecular Diagnosis Rate of Phenotypic Subgroups by Age Group for Other Clinical Exome Sequencing

|                                           | Age Groups |                 |        |                 |       |              |
|-------------------------------------------|------------|-----------------|--------|-----------------|-------|--------------|
|                                           | <5 y       |                 | 5-18 y |                 | >18 y |              |
|                                           | Rate       | % (95% CI)      | Rate   | % (95% CI)      | Rate  | % (95% CI)   |
| DD                                        | 1/6        | 17<br>(1-58)    | 2/13   | 15<br>(3-43)    | 0/5   | 0<br>(0-49)  |
| DD + hypotonia                            | 0/1        | 0<br>(0-83)     | 0/3    | 0<br>(0-62)     | -     |              |
| DD + epilepsy or seizures                 | 0/1        | 0<br>(0-83)     | 1/7    | 14<br>(1-53)    | 0/1   | 0<br>(0-83)  |
| DD + dysmorphic features                  | 1/3        | 33<br>(6-80)    | 2/9    | 22<br>(5-56)    | 0/3   | 0<br>(0-62)  |
| DD + autism                               | 0/3        | 0<br>(0-62)     | 1/7    | 14<br>(1-53)    | 0/2   | 0<br>(0-71)  |
| DD + heart disorder                       |            |                 | 1/2    | 50<br>(9-91)    |       |              |
| Ataxia and related neurological disorders | 0/1        | 0<br>(0-83)     | 0/1    | 0<br>(0-83)     | 0/1   | 0<br>(0-83)  |
| Muscular dystrophy and related disorders  |            |                 | 0/1    | 0<br>(0-83)     | 0/1   | 0<br>(0-83)  |
| Cardiomyopathy and arrhythmia             | 0/2        | 0<br>(0-71)     |        |                 |       |              |
| Cancer predisposition                     | 1/1        | 100<br>(17-100) | 0/2    | 0<br>(0-71)     | 0/2   | 0<br>(0-71)  |
| Disorder of sexual development            | 0/1        | 0<br>(0-83)     | 1/1    | 100<br>(17-100) | 0/1   | 0<br>(0-83)  |
| Retinal disorders                         |            |                 | 2/3    | 67<br>(20-94)   | 1/5   | 20<br>(2-64) |

Abbreviations: CES, clinical exome sequencing; DD, developmental delay.

<sup>a</sup>The other CES group includes cases where only 1 or no parent was sequenced but other family members were sequenced.

## References

1. Strom SP, Lee H, Das K, et al. Assessing the necessity of confirmatory testing for exome-sequencing results in a clinical molecular diagnostic laboratory. *Genetics in medicine : official journal of the American College of Medical Genetics*. Jul 2014;16(7):510-515.
2. McKenna A, Hanna M, Banks E, et al. The Genome Analysis Toolkit: a MapReduce framework for analyzing next-generation DNA sequencing data. *Genome research*. Sep 2010;20(9):1297-1303.
3. DePristo MA, Banks E, Poplin R, et al. A framework for variation discovery and genotyping using next-generation DNA sequencing data. *Nature genetics*. May 2011;43(5):491-498.
4. Yourshaw M, Taylor SP, Rao AR, Martin MG, Nelson SF. Rich annotation of DNA sequencing variants by leveraging the Ensembl Variant Effect Predictor with plugins. *Briefings in bioinformatics*. Mar 12 2014. DOI: 10.1093/bib/bbu008
5. Bahlo M, Bromhead CJ. Generating linkage mapping files from Affymetrix SNP chip data. *Bioinformatics*. Aug 1 2009;25(15):1961-1962.
6. Smith KR, Bromhead CJ, Hildebrand MS, et al. Reducing the exome search space for mendelian diseases using genetic linkage analysis of exome genotypes. *Genome biology*. 2011;12(9):R85.
7. Purcell S, Neale B, Todd-Brown K, et al. PLINK: a tool set for whole-genome association and population-based linkage analyses. *American journal of human genetics*. Sep 2007;81(3):559-575.
8. Bamshad MJ, Ng SB, Bigham AW, et al. Exome sequencing as a tool for Mendelian disease gene discovery. *Nature reviews. Genetics*. Nov 2011;12(11):745-755.
9. Chauveau C, Rowell J, Ferreira A. A Rising Titan: TTN Review and Mutation Update. *Human mutation*. Sep 2014;35(9):1046-1059.
10. Ionita-Laza I, Lange C, N ML. Estimating the number of unseen variants in the human genome. *Proceedings of the National Academy of Sciences of the United States of America*. Mar 31 2009;106(13):5008-5013.
